# Supplementary material for: Reduced sister chromatid cohesion acts as a tumor penetrance modifier
Source: PLoS Genet. 2022 Aug 22;18(8):e1010341. doi: 10.1371/journal.pgen.1010341 (PMC9436123; doi:10.1371/journal.pgen.1010341)
Supplement: S2 Table — (XLSX) [file pgen.1010341.s005.xlsx]

## Sheet: loh_mr_ratio_all_esco2
Sample	Cohort	ESCO2_Status	Count_LOH	Count_MR
TCGA-KK-A6E6-01	PRAD	WT	21	11
TCGA-KK-A8IA-01	PRAD	WT	59	4
TCGA-KK-A6E4-01	PRAD	WT	36	3
TCGA-VP-A878-01	PRAD	WT	73	9
TCGA-H9-7775-01	PRAD	WT	20	2
TCGA-XJ-A9DX-01	PRAD	WT	72	22
TCGA-G9-6343-01	PRAD	WT	2	0
TCGA-G9-6339-01	PRAD	WT	41	2
TCGA-EJ-5509-01	PRAD	WT	78	6
TCGA-J9-A8CM-01	PRAD	WT	36	4
TCGA-KK-A6E7-01	PRAD	WT	30	21
TCGA-V1-A9OF-01	PRAD	WT	28	4
TCGA-CH-5754-01	PRAD	WT	75	5
TCGA-YL-A8HM-01	PRAD	MT	259	81
TCGA-EJ-7797-01	PRAD	WT	10	0
TCGA-YL-A9WI-01	PRAD	WT	166	22
TCGA-EJ-7314-01	PRAD	WT	19	0
TCGA-XA-A8JR-01	PRAD	WT	28	2
TCGA-HC-7736-01	PRAD	WT	81	4
TCGA-QU-A6IN-01	PRAD	WT	34	1
TCGA-CH-5751-01	PRAD	WT	97	39
TCGA-V1-A8WL-01	PRAD	WT	34	1
TCGA-HC-A6AO-01	PRAD	WT	43	2
TCGA-KK-A7B3-01	PRAD	WT	38	34
TCGA-KK-A59V-01	PRAD	WT	44	3
TCGA-EJ-AB27-01	PRAD	WT	31	6
TCGA-EJ-8468-01	PRAD	WT	61	8
TCGA-KK-A8I5-01	PRAD	WT	87	9
TCGA-YL-A8S9-01	PRAD	WT	42	3
TCGA-CH-5761-01	PRAD	WT	86	9
TCGA-KK-A7AZ-01	PRAD	WT	60	4
TCGA-G9-6366-01	PRAD	WT	14	1
TCGA-YL-A8SQ-01	PRAD	WT	68	44
TCGA-KC-A4BN-01	PRAD	WT	8	1
TCGA-KK-A8IG-01	PRAD	WT	72	10
TCGA-ZG-A8QW-01	PRAD	WT	85	4
TCGA-EJ-7786-01	PRAD	WT	5	0
TCGA-J4-A83K-01	PRAD	WT	8	1
TCGA-YL-A8HK-01	PRAD	WT	71	1
TCGA-EJ-5501-01	PRAD	WT	34	0
TCGA-EJ-8470-01	PRAD	WT	183	9
TCGA-J9-A8CL-01	PRAD	WT	82	17
TCGA-EJ-A7NF-01	PRAD	WT	27	8
TCGA-HC-7231-01	PRAD	WT	21	1
TCGA-XK-AAJA-01	PRAD	WT	357	36
TCGA-KK-A7B4-01	PRAD	WT	71	5
TCGA-HC-8264-01	PRAD	WT	34	1
TCGA-ZG-A9MC-01	PRAD	WT	49	11
TCGA-YL-A8SB-01	PRAD	WT	35	6
TCGA-KK-A6E8-01	PRAD	WT	108	12
TCGA-HC-7821-01	PRAD	WT	50	2
TCGA-HC-7209-01	PRAD	WT	43	1
TCGA-HC-7742-01	PRAD	WT	28	2
TCGA-G9-6351-01	PRAD	WT	7	0
TCGA-EJ-8474-01	PRAD	WT	24	2
TCGA-HC-7075-01	PRAD	WT	19	0
TCGA-J9-A8CP-01	PRAD	WT	136	9
TCGA-KK-A8IM-01	PRAD	WT	77	3
TCGA-G9-6348-01	PRAD	WT	13	0
TCGA-KC-A7F6-01	PRAD	WT	17	0
TCGA-KC-A4BL-01	PRAD	WT	0	0
TCGA-KK-A6E2-01	PRAD	WT	28	3
TCGA-J4-A67Q-01	PRAD	WT	13	4
TCGA-2A-A8VL-01	PRAD	WT	38	3
TCGA-V1-A9ZK-01	PRAD	WT	49	3
TCGA-V1-A9O5-01	PRAD	WT	66	1
TCGA-VP-A879-01	PRAD	WT	13	2
TCGA-VN-A88Q-01	PRAD	WT	40	1
TCGA-HC-7737-01	PRAD	WT	11	1
TCGA-V1-A8WS-01	PRAD	WT	48	1
TCGA-HC-8213-01	PRAD	WT	32	4
TCGA-M7-A721-01	PRAD	WT	42	4
TCGA-CH-5788-01	PRAD	WT	162	21
TCGA-ZG-A9LZ-01	PRAD	WT	100	13
TCGA-CH-5765-01	PRAD	WT	39	2
TCGA-V1-A8WW-01	PRAD	WT	50	3
TCGA-V1-A9OQ-01	PRAD	WT	58	7
TCGA-EJ-5514-01	PRAD	WT	27	2
TCGA-G9-6384-01	PRAD	WT	13	0
TCGA-V1-A9ZG-01	PRAD	WT	70	8
TCGA-G9-6377-01	PRAD	WT	20	0
TCGA-M7-A722-01	PRAD	WT	38	2
TCGA-G9-6361-01	PRAD	WT	56	4
TCGA-EJ-5511-01	PRAD	WT	9	0
TCGA-ZG-A9LN-01	PRAD	WT	35	12
TCGA-EJ-5526-01	PRAD	WT	33	0
TCGA-YJ-A8SW-01	PRAD	MT	79	19
TCGA-EJ-7794-01	PRAD	WT	16	0
TCGA-EJ-A46B-01	PRAD	WT	4	2
TCGA-EJ-5542-01	PRAD	WT	33	1
TCGA-YL-A9WJ-01	PRAD	WT	45	2
TCGA-V1-A9Z8-01	PRAD	WT	48	1
TCGA-EJ-A46F-01	PRAD	WT	48	2
TCGA-YL-A8SK-01	PRAD	WT	61	6
TCGA-MG-AAMC-01	PRAD	WT	62	7
TCGA-X4-A8KS-01	PRAD	WT	13	3
TCGA-J4-A67M-01	PRAD	WT	33	3
TCGA-ZG-A9L0-01	PRAD	WT	194	14
TCGA-HC-7077-01	PRAD	WT	28	2
TCGA-CH-5769-01	PRAD	WT	66	10
TCGA-G9-6499-01	PRAD	WT	17	10
TCGA-EJ-5519-01	PRAD	WT	45	0
TCGA-J4-A67T-01	PRAD	WT	22	8
TCGA-HC-7748-01	PRAD	WT	21	0
TCGA-H9-A6BY-01	PRAD	WT	11	0
TCGA-G9-6365-01	PRAD	WT	3	0
TCGA-G9-6367-01	PRAD	WT	0	0
TCGA-G9-7510-01	PRAD	WT	24	0
TCGA-KK-A6E3-01	PRAD	WT	5	1
TCGA-G9-6336-01	PRAD	WT	0	0
TCGA-EJ-5517-01	PRAD	WT	8	0
TCGA-V1-A8MG-01	PRAD	WT	77	4
TCGA-KC-A7FE-01	PRAD	WT	0	0
TCGA-HC-7817-01	PRAD	WT	10	4
TCGA-J4-AAU2-01	PRAD	WT	5	2
TCGA-V1-A8MJ-01	PRAD	WT	44	4
TCGA-VP-A87C-01	PRAD	WT	63	3
TCGA-HC-A8D0-01	PRAD	WT	56	4
TCGA-EJ-5497-01	PRAD	WT	8	0
TCGA-Y6-A9XI-01	PRAD	WT	32	0
TCGA-SU-A7E7-01	PRAD	WT	38	6
TCGA-KK-A8IL-01	PRAD	WT	8	0
TCGA-HC-8265-01	PRAD	WT	18	2
TCGA-CH-5737-01	PRAD	WT	83	4
TCGA-G9-6338-01	PRAD	WT	60	0
TCGA-KK-A7AV-01	PRAD	WT	29	2
TCGA-EJ-7218-01	PRAD	WT	53	5
TCGA-YL-A8SC-01	PRAD	WT	60	7
TCGA-XK-AAJR-01	PRAD	WT	66	2
TCGA-2A-AAYF-01	PRAD	WT	25	2
TCGA-V1-A8X3-01	PRAD	WT	22	4
TCGA-M7-A71Z-01	PRAD	WT	62	4
TCGA-EJ-5498-01	PRAD	WT	6	0
TCGA-ZG-A9L2-01	PRAD	WT	48	4
TCGA-KK-A8I8-01	PRAD	WT	49	3
TCGA-CH-5750-01	PRAD	WT	8	0
TCGA-ZG-A9ND-01	PRAD	WT	135	6
TCGA-VP-AA1N-01	PRAD	WT	139	98
TCGA-EJ-A65B-01	PRAD	WT	26	1
TCGA-QU-A6IO-01	PRAD	WT	65	5
TCGA-EJ-5503-01	PRAD	WT	0	0
TCGA-ZG-A9LU-01	PRAD	WT	84	14
TCGA-EJ-8469-01	PRAD	WT	111	12
TCGA-XJ-A83H-01	PRAD	WT	40	8
TCGA-EJ-7315-01	PRAD	WT	50	0
TCGA-J4-A67L-01	PRAD	WT	34	1
TCGA-ZG-A8QY-01	PRAD	WT	122	5
TCGA-YL-A8SP-01	PRAD	WT	76	3
TCGA-CH-5791-01	PRAD	WT	89	12
TCGA-V1-A9OY-01	PRAD	WT	23	0
TCGA-KC-A4BO-01	PRAD	WT	0	0
TCGA-HC-7212-01	PRAD	WT	15	0
TCGA-YL-A8SO-01	PRAD	WT	137	9
TCGA-KK-A8IF-01	PRAD	WT	198	10
TCGA-EJ-A7NK-01	PRAD	WT	8	4
TCGA-ZG-A9L4-01	PRAD	WT	23	6
TCGA-EJ-5522-01	PRAD	WT	33	0
TCGA-HC-7747-01	PRAD	WT	43	0
TCGA-ZG-A9M4-01	PRAD	WT	59	35
TCGA-EJ-A8FS-01	PRAD	WT	29	1
TCGA-HC-A4ZV-01	PRAD	WT	72	8
TCGA-G9-A9S0-01	PRAD	WT	54	3
TCGA-EJ-5506-01	PRAD	WT	0	0
TCGA-KK-A7AP-01	PRAD	WT	48	2
TCGA-VP-A87D-01	PRAD	WT	60	9
TCGA-TP-A8TT-01	PRAD	WT	90	7
TCGA-KK-A8II-01	PRAD	WT	79	6
TCGA-V1-A9Z9-01	PRAD	WT	69	4
TCGA-ZG-A9LS-01	PRAD	WT	57	1
TCGA-HC-7232-01	PRAD	WT	22	1
TCGA-EJ-A8FO-01	PRAD	WT	7	1
TCGA-J9-A52B-01	PRAD	WT	48	4
TCGA-CH-5767-01	PRAD	WT	47	2
TCGA-J4-AATV-01	PRAD	WT	5	2
TCGA-HC-7081-01	PRAD	WT	26	0
TCGA-V1-A9OH-01	PRAD	WT	24	2
TCGA-CH-5752-01	PRAD	WT	47	3
TCGA-VP-A87H-01	PRAD	WT	40	15
TCGA-G9-7521-01	PRAD	WT	13	11
TCGA-YL-A8HO-01	PRAD	WT	166	58
TCGA-YL-A9WK-01	PRAD	WT	84	6
TCGA-J4-A83M-01	PRAD	WT	32	5
TCGA-EJ-AB20-01	PRAD	WT	10	4
TCGA-HC-A76X-01	PRAD	WT	19	1
TCGA-EJ-7781-01	PRAD	WT	6	0
TCGA-G9-6385-01	PRAD	WT	0	0
TCGA-VN-A88N-01	PRAD	WT	25	5
TCGA-HC-7745-01	PRAD	WT	32	2
TCGA-HC-7078-01	PRAD	WT	34	5
TCGA-FC-A5OB-01	PRAD	WT	42	6
TCGA-G9-6379-01	PRAD	WT	48	40
TCGA-QU-A6IP-01	PRAD	WT	8	1
TCGA-J4-AATZ-01	PRAD	WT	55	7
TCGA-EJ-5524-01	PRAD	WT	45	1
TCGA-V1-A9OL-01	PRAD	WT	104	12
TCGA-HC-7210-01	PRAD	WT	33	1
TCGA-KK-A8I7-01	PRAD	WT	61	6
TCGA-EJ-7791-01	PRAD	WT	0	0
TCGA-CH-5762-01	PRAD	WT	42	10
TCGA-J9-A8CK-01	PRAD	WT	50	1
TCGA-KK-A8IC-01	PRAD	WT	81	4
TCGA-G9-6356-01	PRAD	WT	3	0
TCGA-KC-A4BV-01	PRAD	WT	141	12
TCGA-EJ-7788-01	PRAD	WT	23	0
TCGA-ZG-A9LB-01	PRAD	WT	44	17
TCGA-J9-A8CN-01	PRAD	WT	46	3
TCGA-ZG-A9L1-01	PRAD	WT	57	23
TCGA-G9-6333-01	PRAD	WT	33	1
TCGA-VP-A875-01	PRAD	WT	29	4
TCGA-EJ-5495-01	PRAD	WT	13	2
TCGA-H9-A6BX-01	PRAD	WT	7	3
TCGA-KK-A59Y-01	PRAD	WT	53	3
TCGA-V1-A8WN-01	PRAD	WT	10	0
TCGA-KK-A7B1-01	PRAD	WT	47	2
TCGA-HC-A631-01	PRAD	WT	52	6
TCGA-YL-A8SA-01	PRAD	WT	65	3
TCGA-HC-8262-01	PRAD	WT	39	0
TCGA-KC-A7FD-01	PRAD	WT	17	3
TCGA-HI-7170-01	PRAD	WT	2	0
TCGA-CH-5789-01	PRAD	WT	7	3
TCGA-V1-A9O7-01	PRAD	WT	46	8
TCGA-HC-A6AS-01	PRAD	WT	0	0
TCGA-EJ-7784-01	PRAD	WT	12	8
TCGA-KC-A7F3-01	PRAD	WT	144	11
TCGA-HC-8256-01	PRAD	WT	20	1
TCGA-J4-A83I-01	PRAD	WT	56	3
TCGA-G9-6373-01	PRAD	WT	24	1
TCGA-G9-6371-01	PRAD	WT	1	0
TCGA-EJ-5527-01	PRAD	WT	18	1
TCGA-XQ-A8TA-01	PRAD	WT	194	55
TCGA-EJ-7328-01	PRAD	WT	13	0
TCGA-EJ-A46D-01	PRAD	WT	22	2
TCGA-ZG-A9L9-01	PRAD	WT	89	68
TCGA-YL-A8SI-01	PRAD	WT	21	6
TCGA-M7-A724-01	PRAD	WT	269	21
TCGA-VN-A88K-01	PRAD	WT	57	9
TCGA-EJ-A65G-01	PRAD	WT	13	7
TCGA-CH-5772-01	PRAD	WT	17	2
TCGA-V1-A8MK-01	PRAD	WT	0	0
TCGA-YL-A8HJ-01	PRAD	WT	17	4
TCGA-KK-A8ID-01	PRAD	WT	33	3
TCGA-G9-6353-01	PRAD	WT	0	0
TCGA-KK-A8I9-01	PRAD	WT	44	3
TCGA-EJ-A46H-01	PRAD	WT	5	2
TCGA-EJ-7317-01	PRAD	WT	4	1
TCGA-YL-A8S8-01	PRAD	WT	151	39
TCGA-XJ-A9DQ-01	PRAD	WT	4	3
TCGA-J4-A67O-01	PRAD	WT	19	1
TCGA-Y6-A8TL-01	PRAD	WT	79	9
TCGA-XK-AAIV-01	PRAD	WT	76	57
TCGA-CH-5790-01	PRAD	WT	35	5
TCGA-ZG-A9L5-01	PRAD	WT	26	19
TCGA-V1-A8MF-01	PRAD	WT	41	2
TCGA-EJ-A7NJ-01	PRAD	WT	6	1
TCGA-EJ-A65E-01	PRAD	WT	74	1
TCGA-ZG-A8QX-01	PRAD	WT	39	2
TCGA-G9-6342-01	PRAD	WT	17	0
TCGA-KK-A8IB-01	PRAD	WT	11	3
TCGA-HC-7230-01	PRAD	WT	14	0
TCGA-XK-AAIR-01	PRAD	WT	104	14
TCGA-CH-5741-01	PRAD	WT	39	0
TCGA-XK-AAJT-01	PRAD	WT	257	67
TCGA-J4-8200-01	PRAD	WT	12	1
TCGA-KK-A7AQ-01	PRAD	WT	212	11
TCGA-EJ-5532-01	PRAD	WT	8	0
TCGA-HI-7168-01	PRAD	WT	40	26
TCGA-V1-A9O9-01	PRAD	WT	50	3
TCGA-HC-7233-01	PRAD	WT	3	0
TCGA-HC-A6AL-01	PRAD	WT	23	3
TCGA-EJ-7783-01	PRAD	WT	6	0
TCGA-ZG-A9KY-01	PRAD	WT	94	20
TCGA-EJ-A8FU-01	PRAD	WT	11	4
TCGA-EJ-A65M-01	PRAD	WT	87	2
TCGA-J9-A52E-01	PRAD	WT	61	39
TCGA-XK-AAJP-01	PRAD	WT	138	13
TCGA-2A-A8VO-01	PRAD	WT	27	4
TCGA-HC-8259-01	PRAD	WT	7	0
TCGA-G9-6378-01	PRAD	WT	9	0
TCGA-J4-A83L-01	PRAD	WT	16	3
TCGA-VN-A88P-01	PRAD	WT	53	9
TCGA-EJ-5507-01	PRAD	WT	37	3
TCGA-CH-5744-01	PRAD	WT	74	4
TCGA-ZG-A9N3-01	PRAD	WT	102	68
TCGA-G9-6354-01	PRAD	WT	46	5
TCGA-VN-A88O-01	PRAD	WT	20	1
TCGA-EJ-5502-01	PRAD	WT	0	0
TCGA-G9-6369-01	PRAD	WT	62	3
TCGA-KK-A6E1-01	PRAD	WT	76	69
TCGA-HC-7211-01	PRAD	WT	11	0
TCGA-KK-A8I6-01	PRAD	WT	28	3
TCGA-XJ-A83F-01	PRAD	WT	71	5
TCGA-EJ-7785-01	PRAD	WT	26	0
TCGA-VP-A87B-01	PRAD	WT	120	12
TCGA-YL-A8SR-01	PRAD	WT	106	9
TCGA-EJ-7327-01	PRAD	WT	32	0
TCGA-4L-AA1F-01	PRAD	WT	63	44
TCGA-KK-A7AY-01	PRAD	WT	51	4
TCGA-EJ-A8FP-01	PRAD	WT	7	1
TCGA-2A-AAYU-01	PRAD	WT	65	5
TCGA-HC-A76W-01	PRAD	WT	31	6
TCGA-EJ-5516-01	PRAD	WT	33	0
TCGA-G9-A9S7-01	PRAD	WT	61	3
TCGA-HC-8216-01	PRAD	WT	69	15
TCGA-CH-5794-01	PRAD	WT	41	1
TCGA-V1-A9OA-01	PRAD	WT	50	3
TCGA-EJ-A8FN-01	PRAD	WT	32	5
TCGA-HC-7818-01	PRAD	WT	0	0
TCGA-G9-7525-01	PRAD	WT	74	72
TCGA-FC-7961-01	PRAD	WT	66	38
TCGA-EJ-5504-01	PRAD	WT	49	1
TCGA-VP-A87J-01	PRAD	WT	61	3
TCGA-J4-A67S-01	PRAD	WT	53	2
TCGA-KK-A8IK-01	PRAD	WT	47	33
TCGA-HC-A6AQ-01	PRAD	WT	12	3
TCGA-CH-5763-01	PRAD	WT	0	0
TCGA-HC-A8D1-01	PRAD	WT	21	2
TCGA-KK-A7AU-01	PRAD	WT	55	4
TCGA-CH-5766-01	PRAD	WT	72	6
TCGA-KK-A7B0-01	PRAD	WT	58	4
TCGA-EJ-7321-01	PRAD	WT	2	2
TCGA-VN-A943-01	PRAD	WT	98	14
TCGA-KK-A59X-01	PRAD	WT	251	15
TCGA-KK-A8I4-01	PRAD	WT	102	31
TCGA-G9-7523-01	PRAD	WT	10	0
TCGA-EJ-5494-01	PRAD	WT	5	2
TCGA-2A-A8VT-01	PRAD	MT	49	32
TCGA-HC-7213-01	PRAD	WT	23	19
TCGA-G9-7519-01	PRAD	WT	3	1
TCGA-TK-A8OK-01	PRAD	WT	73	4
TCGA-EJ-7325-01	PRAD	WT	65	0
TCGA-ZG-A9LM-01	PRAD	WT	110	5
TCGA-XJ-A9DK-01	PRAD	WT	6	3
TCGA-EJ-7789-01	PRAD	MT	203	10
TCGA-HC-8257-01	PRAD	WT	75	3
TCGA-EJ-A7NG-01	PRAD	WT	7	2
TCGA-EJ-7318-01	PRAD	WT	25	3
TCGA-EJ-5512-01	PRAD	WT	22	0
TCGA-EJ-A46E-01	PRAD	WT	0	0
TCGA-FC-A4JI-01	PRAD	WT	162	96
TCGA-EJ-5521-01	PRAD	WT	28	2
TCGA-KC-A4BR-01	PRAD	WT	0	0
TCGA-2A-AAYO-01	PRAD	WT	16	3
TCGA-2A-A8W3-01	PRAD	WT	52	2
TCGA-G9-6364-01	PRAD	WT	17	1
TCGA-YL-A8SL-01	PRAD	WT	56	40
TCGA-YL-A9WL-01	PRAD	WT	88	5
TCGA-HC-A6HX-01	PRAD	WT	23	12
TCGA-M7-A720-01	PRAD	WT	12	6
TCGA-HC-7080-01	PRAD	WT	126	3
TCGA-EJ-7331-01	PRAD	WT	19	0
TCGA-ZG-A9LY-01	PRAD	WT	70	5
TCGA-G9-6494-01	PRAD	WT	26	1
TCGA-M7-A71Y-01	PRAD	WT	23	4
TCGA-EJ-7793-01	PRAD	WT	5	0
TCGA-EJ-A65D-01	PRAD	WT	41	1
TCGA-XK-AAJU-01	PRAD	WT	8	5
TCGA-HC-8266-01	PRAD	WT	13	1
TCGA-YL-A8HL-01	PRAD	WT	63	6
TCGA-VN-A88I-01	PRAD	WT	14	4
TCGA-HI-7169-01	PRAD	WT	4	0
TCGA-CH-5753-01	PRAD	WT	44	5
TCGA-J4-A67K-01	PRAD	WT	15	2
TCGA-QU-A6IM-01	PRAD	WT	83	15
TCGA-HC-A9TE-01	PRAD	WT	54	33
TCGA-EJ-7115-01	PRAD	WT	53	7
TCGA-EJ-5531-01	PRAD	WT	10	1
TCGA-YL-A8SH-01	PRAD	WT	97	10
TCGA-G9-6362-01	PRAD	WT	12	0
TCGA-HC-8258-01	PRAD	WT	0	0
TCGA-EJ-5530-01	PRAD	WT	2	0
TCGA-VN-A88M-01	PRAD	WT	10	0
TCGA-EJ-7782-01	PRAD	WT	169	10
TCGA-YL-A8SF-01	PRAD	WT	89	11
TCGA-EJ-7123-01	PRAD	WT	17	0
TCGA-CH-5792-01	PRAD	WT	94	5
TCGA-J4-A6G1-01	PRAD	WT	10	4
TCGA-J4-A6M7-01	PRAD	WT	18	3
TCGA-VP-A872-01	PRAD	WT	51	1
TCGA-V1-A8ML-01	PRAD	WT	20	2
TCGA-HC-7744-01	PRAD	WT	43	1
TCGA-EJ-A46I-01	PRAD	WT	0	0
TCGA-2A-A8W1-01	PRAD	WT	129	10
TCGA-HC-A8CY-01	PRAD	WT	37	5
TCGA-KK-A6E0-01	PRAD	WT	309	25
TCGA-XK-AAIW-01	PRAD	MT	8	2
TCGA-HC-8260-01	PRAD	WT	1	0
TCGA-HC-7740-01	PRAD	WT	1	0
TCGA-TP-A8TV-01	PRAD	WT	145	9
TCGA-FC-A6HD-01	PRAD	WT	15	5
TCGA-EJ-8472-01	PRAD	WT	67	51
TCGA-EJ-5508-01	PRAD	WT	6	0
TCGA-EJ-A7NH-01	PRAD	WT	66	7
TCGA-KK-A7B2-01	PRAD	WT	8	2
TCGA-CH-5740-01	PRAD	WT	58	2
TCGA-YL-A9WH-01	PRAD	WT	63	38
TCGA-FC-A8O0-01	PRAD	WT	4	2
TCGA-J9-A52C-01	PRAD	WT	15	4
TCGA-FC-7708-01	PRAD	WT	39	0
TCGA-KK-A7AW-01	PRAD	WT	22	2
TCGA-G9-7509-01	PRAD	WT	16	4
TCGA-J4-A67R-01	PRAD	WT	5	2
TCGA-WW-A8ZI-01	PRAD	WT	69	3
TCGA-KK-A8IJ-01	PRAD	WT	49	2
TCGA-J4-A83N-01	PRAD	WT	32	9
TCGA-HC-A6AN-01	PRAD	WT	58	4
TCGA-EJ-5499-01	PRAD	WT	34	0
TCGA-QU-A6IL-01	PRAD	WT	170	16
TCGA-CH-5738-01	PRAD	WT	10	5
TCGA-V1-A9ZI-01	PRAD	WT	54	0
TCGA-CH-5748-01	PRAD	WT	23	10
TCGA-HC-7819-01	PRAD	WT	10	0
TCGA-G9-7522-01	PRAD	WT	10	0
TCGA-HC-A6AP-01	PRAD	WT	29	4
TCGA-EJ-7330-01	PRAD	WT	111	12
TCGA-KK-A6DY-01	PRAD	WT	28	1
TCGA-V1-A8MU-01	PRAD	WT	45	1
TCGA-EJ-5510-01	PRAD	WT	19	2
TCGA-VN-A88R-01	PRAD	WT	129	2
TCGA-CH-5746-01	PRAD	WT	18	0
TCGA-V1-A9Z7-01	PRAD	WT	122	9
TCGA-M7-A725-01	PRAD	WT	61	3
TCGA-XJ-A9DI-01	PRAD	WT	4	0
TCGA-J4-A67N-01	PRAD	WT	98	3
TCGA-XJ-A83G-01	PRAD	WT	91	7
TCGA-ZG-A8QZ-01	PRAD	WT	53	6
TCGA-HI-7171-01	PRAD	WT	55	2
TCGA-VP-A876-01	PRAD	WT	38	4
TCGA-KK-A6E5-01	PRAD	WT	97	11
TCGA-X4-A8KQ-01	PRAD	WT	47	2
TCGA-EJ-7125-01	PRAD	WT	2	0
TCGA-HC-7820-01	PRAD	WT	15	1
TCGA-CH-5739-01	PRAD	WT	51	5
TCGA-HC-7750-01	PRAD	WT	2	1
TCGA-YL-A9WX-01	PRAD	WT	36	5
TCGA-EJ-5518-01	PRAD	WT	58	4
TCGA-ZG-A9NI-01	PRAD	WT	33	24
TCGA-YL-A9WY-01	PRAD	WT	56	40
TCGA-EJ-5515-01	PRAD	WT	0	0
TCGA-KK-A8IH-01	PRAD	WT	93	5
TCGA-VP-A87K-01	PRAD	WT	48	1
TCGA-HC-A6HY-01	PRAD	WT	20	4
TCGA-HC-A632-01	PRAD	MT	78	3
TCGA-G9-6496-01	PRAD	WT	46	0
TCGA-EJ-A7NM-01	PRAD	WT	62	9
TCGA-ZG-A9L6-01	PRAD	WT	53	7
TCGA-2A-A8VV-01	PRAD	WT	22	4
TCGA-VP-A87E-01	PRAD	WT	5	2
TCGA-CH-5764-01	PRAD	WT	41	4
TCGA-EJ-5525-01	PRAD	WT	24	1
TCGA-J4-A83J-01	PRAD	WT	187	16
TCGA-KK-A59Z-01	PRAD	WT	54	41
TCGA-V1-A9ZR-01	PRAD	WT	84	4
TCGA-EJ-A6RC-01	PRAD	WT	6	3
TCGA-EJ-7792-01	PRAD	WT	6	0
TCGA-HC-A9TH-01	PRAD	WT	61	1
TCGA-M7-A723-01	PRAD	WT	0	0
TCGA-HC-7752-01	PRAD	WT	44	2
TCGA-EJ-A65J-01	PRAD	WT	67	6
TCGA-V1-A8WV-01	PRAD	WT	70	51
TCGA-2A-A8VX-01	PRAD	WT	146	14
TCGA-V1-A9OT-01	PRAD	WT	40	4
TCGA-KC-A7FA-01	PRAD	WT	57	4
TCGA-G9-6370-01	PRAD	WT	0	0
TCGA-CH-5771-01	PRAD	WT	0	0
TCGA-YL-A8SJ-01	PRAD	WT	59	10
TCGA-HC-7738-01	PRAD	WT	10	8
TCGA-EJ-A6RA-01	PRAD	WT	5	2
TCGA-J4-8198-01	PRAD	WT	18	0
TCGA-G9-6347-01	PRAD	WT	8	4
TCGA-G9-6363-01	PRAD	WT	31	0
TCGA-HC-A48F-01	PRAD	WT	91	2
TCGA-HC-7749-01	PRAD	WT	18	0
TCGA-CH-5768-01	PRAD	WT	61	6
TCGA-G9-6332-01	PRAD	WT	33	2
TCGA-EJ-A46G-01	PRAD	WT	71	16
TCGA-V1-A9OX-01	PRAD	WT	123	8
TCGA-J4-A6G3-01	PRAD	WT	0	0
TCGA-VN-A88L-01	PRAD	WT	40	5
TCGA-EJ-7312-01	PRAD	WT	83	0
TCGA-V1-A8MM-01	PRAD	WT	84	4
TCGA-EJ-A65F-01	PRAD	WT	34	2
TCGA-G9-6498-01	PRAD	WT	15	2
TCGA-EJ-5505-01	PRAD	WT	28	1
TCGA-HC-8261-01	PRAD	WT	29	1
TCGA-XQ-A8TB-01	PRAD	WT	82	20
TCGA-G9-6329-01	PRAD	WT	5	0
TCGA-EJ-5496-01	PRAD	WT	12	0
TCGA-D1-A0ZV-01	UCEC	WT	3	1
TCGA-B5-A5OE-01	UCEC	WT	161	9
TCGA-A5-A0GI-01	UCEC	WT	1	0
TCGA-B5-A0K8-01	UCEC	WT	43	6
TCGA-AP-A1DO-01	UCEC	WT	3	1
TCGA-AX-A2H7-01	UCEC	WT	3	1
TCGA-EC-A24G-01	UCEC	WT	2	0
TCGA-AP-A054-01	UCEC	WT	2	0
TCGA-B5-A0K1-01	UCEC	WT	0	0
TCGA-D1-A0ZZ-01	UCEC	MT	79	35
TCGA-AX-A1CR-01	UCEC	WT	62	52
TCGA-BG-A3PP-01	UCEC	WT	44	29
TCGA-B5-A0K4-01	UCEC	WT	0	0
TCGA-AP-A05H-01	UCEC	MT	92	35
TCGA-A5-A3LO-01	UCEC	WT	15	4
TCGA-AP-A0LM-01	UCEC	WT	1	0
TCGA-PG-A5BC-01	UCEC	WT	177	37
TCGA-AP-A5FX-01	UCEC	WT	136	68
TCGA-D1-A3DG-01	UCEC	WT	39	9
TCGA-B5-A1MY-01	UCEC	MT	42	28
TCGA-A5-A1OF-01	UCEC	MT	5	1
TCGA-AP-A1E1-01	UCEC	WT	1	0
TCGA-AX-A3FZ-01	UCEC	WT	19	13
TCGA-DI-A1NN-01	UCEC	WT	31	23
TCGA-AX-A2HK-01	UCEC	WT	37	6
TCGA-B5-A11L-01	UCEC	WT	3	1
TCGA-EC-A1NJ-01	UCEC	WT	1	0
TCGA-A5-A2K7-01	UCEC	WT	2	0
TCGA-B5-A3FC-01	UCEC	MT	4	0
TCGA-D1-A16I-01	UCEC	WT	102	18
TCGA-EY-A3L3-01	UCEC	WT	62	37
TCGA-EY-A549-01	UCEC	WT	3	0
TCGA-AP-A0LV-01	UCEC	WT	4	0
TCGA-KP-A3W4-01	UCEC	WT	33	6
TCGA-D1-A17K-01	UCEC	WT	69	21
TCGA-B5-A0K2-01	UCEC	WT	2	0
TCGA-E6-A8L9-01	UCEC	WT	228	136
TCGA-AJ-A3EK-01	UCEC	WT	1	0
TCGA-EO-A3KX-01	UCEC	WT	1	0
TCGA-EY-A5W2-01	UCEC	WT	3	1
TCGA-PG-A6IB-01	UCEC	WT	3	1
TCGA-D1-A17T-01	UCEC	WT	0	0
TCGA-BG-A221-01	UCEC	WT	1	0
TCGA-EO-A22T-01	UCEC	WT	2	1
TCGA-B5-A1MU-01	UCEC	MT	41	10
TCGA-EY-A1GQ-01	UCEC	WT	0	0
TCGA-DI-A0WH-01	UCEC	WT	2	0
TCGA-D1-A103-01	UCEC	MT	1	0
TCGA-D1-A17U-01	UCEC	WT	4	0
TCGA-D1-A1NS-01	UCEC	WT	0	0
TCGA-EO-A22R-01	UCEC	MT	2	0
TCGA-D1-A16O-01	UCEC	WT	1	0
TCGA-BK-A6W4-01	UCEC	WT	2	0
TCGA-A5-A0R6-01	UCEC	WT	24	12
TCGA-BG-A0MC-01	UCEC	WT	4	1
TCGA-D1-A1NW-01	UCEC	WT	27	2
TCGA-A5-A1OH-01	UCEC	WT	0	0
TCGA-D1-A16Q-01	UCEC	WT	2	0
TCGA-AP-A05N-01	UCEC	WT	2	0
TCGA-BG-A18C-01	UCEC	WT	37	5
TCGA-AJ-A3BI-01	UCEC	WT	35	21
TCGA-AP-A0LT-01	UCEC	WT	0	0
TCGA-BG-A0M8-01	UCEC	WT	27	18
TCGA-D1-A3JQ-01	UCEC	WT	16	3
TCGA-BS-A0V7-01	UCEC	WT	2	0
TCGA-AX-A1CE-01	UCEC	WT	0	0
TCGA-EY-A1GL-01	UCEC	WT	3	2
TCGA-BK-A0C9-01	UCEC	WT	2	0
TCGA-AJ-A3BF-01	UCEC	WT	102	14
TCGA-B5-A11H-01	UCEC	WT	3	0
TCGA-BG-A0M4-01	UCEC	WT	1	1
TCGA-D1-A17D-01	UCEC	WT	0	0
TCGA-FI-A2D6-01	UCEC	WT	2	1
TCGA-B5-A1N2-01	UCEC	WT	84	49
TCGA-AX-A3FT-01	UCEC	WT	1	0
TCGA-BG-A0MK-01	UCEC	WT	1	0
TCGA-DI-A2QT-01	UCEC	WT	30	8
TCGA-D1-A161-01	UCEC	WT	5	0
TCGA-EY-A2OQ-01	UCEC	MT	43	16
TCGA-PG-A916-01	UCEC	WT	18	11
TCGA-EY-A1H0-01	UCEC	WT	2	0
TCGA-BS-A0TC-01	UCEC	WT	2	1
TCGA-A5-A7WK-01	UCEC	WT	187	50
TCGA-AX-A1CA-01	UCEC	WT	49	36
TCGA-BK-A13C-01	UCEC	WT	1	1
TCGA-EO-A3AU-01	UCEC	WT	1	0
TCGA-AP-A0L9-01	UCEC	MT	111	6
TCGA-AX-A05W-01	UCEC	WT	1	0
TCGA-EY-A1GI-01	UCEC	MT	1	0
TCGA-BS-A0TJ-01	UCEC	WT	2	0
TCGA-BG-A0MG-01	UCEC	WT	4	1
TCGA-A5-A2K2-01	UCEC	WT	25	8
TCGA-EY-A1GJ-01	UCEC	WT	66	15
TCGA-B5-A1MR-01	UCEC	MT	1	0
TCGA-A5-A0VP-01	UCEC	WT	2	0
TCGA-D1-A15X-01	UCEC	WT	1	0
TCGA-QF-A5YS-01	UCEC	WT	3	0
TCGA-FI-A2D0-01	UCEC	WT	0	0
TCGA-E6-A2P8-01	UCEC	WT	1	0
TCGA-B5-A11Y-01	UCEC	WT	1	0
TCGA-D1-A17M-01	UCEC	WT	2	0
TCGA-D1-A0ZO-01	UCEC	WT	2	1
TCGA-AP-A1DM-01	UCEC	WT	0	0
TCGA-BG-A186-01	UCEC	WT	2	0
TCGA-BG-A0M2-01	UCEC	WT	8	3
TCGA-BK-A0CA-01	UCEC	WT	12	5
TCGA-AJ-A8CW-01	UCEC	WT	4	1
TCGA-D1-A1NZ-01	UCEC	WT	0	0
TCGA-A5-A0GH-01	UCEC	WT	1	0
TCGA-D1-A101-01	UCEC	WT	2	0
TCGA-AX-A064-01	UCEC	WT	1	0
TCGA-E6-A1LX-01	UCEC	MT	2	0
TCGA-D1-A17R-01	UCEC	WT	3	0
TCGA-AJ-A3EL-01	UCEC	WT	5	0
TCGA-BS-A0TG-01	UCEC	WT	1	1
TCGA-EO-A1Y5-01	UCEC	WT	23	15
TCGA-A5-A0R8-01	UCEC	WT	0	0
TCGA-BG-A0W2-01	UCEC	WT	1	0
TCGA-D1-A16X-01	UCEC	WT	0	0
TCGA-B5-A1MV-01	UCEC	WT	2	0
TCGA-KP-A3VZ-01	UCEC	MT	119	49
TCGA-BS-A0TI-01	UCEC	WT	57	20
TCGA-FI-A2CX-01	UCEC	WT	0	0
TCGA-BG-A0MI-01	UCEC	WT	2	2
TCGA-A5-A0G1-01	UCEC	MT	2	1
TCGA-B5-A3FA-01	UCEC	WT	5	0
TCGA-AJ-A2QL-01	UCEC	WT	1	0
TCGA-AP-A1DH-01	UCEC	WT	0	0
TCGA-AP-A0LO-01	UCEC	WT	0	0
TCGA-AJ-A3OJ-01	UCEC	WT	1	0
TCGA-BG-A0VZ-01	UCEC	WT	2	1
TCGA-EO-A22Y-01	UCEC	WT	4	2
TCGA-D1-A17A-01	UCEC	WT	3	0
TCGA-BG-A2AE-01	UCEC	WT	5	0
TCGA-EO-A3B0-01	UCEC	MT	3	0
TCGA-AX-A2IO-01	UCEC	WT	71	19
TCGA-A5-A0GN-01	UCEC	WT	2	1
TCGA-A5-A0RA-01	UCEC	WT	0	0
TCGA-BG-A0LW-01	UCEC	WT	2	0
TCGA-BS-A0WQ-01	UCEC	WT	0	0
TCGA-AX-A3G9-01	UCEC	WT	2	2
TCGA-EY-A1GC-01	UCEC	WT	66	30
TCGA-D1-A1O0-01	UCEC	WT	83	42
TCGA-EY-A1GW-01	UCEC	WT	28	3
TCGA-D1-A167-01	UCEC	WT	3	2
TCGA-D1-A2G6-01	UCEC	WT	0	0
TCGA-FI-A2F8-01	UCEC	WT	34	15
TCGA-DF-A2KU-01	UCEC	WT	4	1
TCGA-EY-A1GO-01	UCEC	WT	5	3
TCGA-B5-A11F-01	UCEC	WT	8	0
TCGA-SJ-A6ZJ-01	UCEC	WT	13	3
TCGA-A5-A0R7-01	UCEC	WT	13	2
TCGA-A5-A0GE-01	UCEC	WT	6	2
TCGA-EO-A3AY-01	UCEC	WT	4	2
TCGA-AP-A0LG-01	UCEC	WT	0	0
TCGA-BG-A220-01	UCEC	WT	0	0
TCGA-AX-A3G1-01	UCEC	WT	62	9
TCGA-BK-A26L-01	UCEC	WT	72	50
TCGA-FI-A2F4-01	UCEC	WT	0	0
TCGA-AX-A1C8-01	UCEC	WT	37	30
TCGA-AJ-A3BK-01	UCEC	WT	1	0
TCGA-BS-A0UV-01	UCEC	MT	3	1
TCGA-B5-A1MX-01	UCEC	WT	6	0
TCGA-AX-A2H5-01	UCEC	WT	92	23
TCGA-JU-AAVI-01	UCEC	WT	229	45
TCGA-D1-A0ZN-01	UCEC	WT	1	0
TCGA-AP-A1E0-01	UCEC	WT	1	0
TCGA-D1-A3DA-01	UCEC	WT	1	1
TCGA-B5-A11N-01	UCEC	MT	3	0
TCGA-E6-A1LZ-01	UCEC	WT	46	26
TCGA-QS-A744-01	UCEC	WT	10	5
TCGA-BS-A0VI-01	UCEC	WT	2	0
TCGA-BS-A0UA-01	UCEC	MT	1	1
TCGA-EY-A2OM-01	UCEC	WT	4	0
TCGA-AP-A051-01	UCEC	WT	1	0
TCGA-D1-A168-01	UCEC	WT	1	1
TCGA-H5-A2HR-01	UCEC	WT	104	23
TCGA-D1-A0ZP-01	UCEC	WT	32	7
TCGA-D1-A17F-01	UCEC	WT	2	1
TCGA-D1-A16R-01	UCEC	WT	10	1
TCGA-B5-A11Z-01	UCEC	WT	2	1
TCGA-KP-A3W3-01	UCEC	WT	40	20
TCGA-FI-A2D2-01	UCEC	WT	41	29
TCGA-BK-A6W3-01	UCEC	WT	6	1
TCGA-FI-A3PV-01	UCEC	MT	64	24
TCGA-B5-A11J-01	UCEC	WT	1	0
TCGA-EO-A2CG-01	UCEC	WT	51	24
TCGA-AP-A0LP-01	UCEC	WT	0	0
TCGA-EY-A1GP-01	UCEC	WT	26	6
TCGA-BS-A0V6-01	UCEC	WT	2	0
TCGA-DI-A2QU-01	UCEC	WT	72	19
TCGA-2E-A9G8-01	UCEC	WT	175	40
TCGA-FI-A2EW-01	UCEC	WT	39	13
TCGA-A5-A0GU-01	UCEC	WT	0	0
TCGA-EY-A1GS-01	UCEC	WT	60	26
TCGA-EO-A22S-01	UCEC	WT	1	0
TCGA-FI-A2EX-01	UCEC	WT	51	26
TCGA-D1-A17B-01	UCEC	WT	1	1
TCGA-AP-A0LL-01	UCEC	WT	2	2
TCGA-AX-A0J1-01	UCEC	WT	2	2
TCGA-A5-AB3J-01	UCEC	WT	13	2
TCGA-PG-A917-01	UCEC	WT	16	8
TCGA-BK-A0CC-01	UCEC	WT	126	9
TCGA-DF-A2KN-01	UCEC	WT	2	0
TCGA-D1-A1NU-01	UCEC	WT	66	14
TCGA-BG-A0YV-01	UCEC	WT	12	7
TCGA-B5-A0JN-01	UCEC	WT	80	48
TCGA-B5-A5OC-01	UCEC	WT	8	1
TCGA-A5-A0GA-01	UCEC	WT	4	1
TCGA-SL-A6J9-01	UCEC	WT	52	35
TCGA-D1-A1NY-01	UCEC	WT	2	0
TCGA-BK-A139-01	UCEC	WT	102	44
TCGA-D1-A16G-01	UCEC	WT	12	6
TCGA-B5-A1MS-01	UCEC	WT	40	25
TCGA-EY-A1GR-01	UCEC	WT	77	40
TCGA-BS-A0U5-01	UCEC	WT	3	2
TCGA-BS-A0TE-01	UCEC	WT	56	8
TCGA-DI-A1NO-01	UCEC	WT	89	41
TCGA-BG-A0MU-01	UCEC	WT	2	1
TCGA-D1-A15W-01	UCEC	WT	1	0
TCGA-AJ-A3BH-01	UCEC	WT	4	0
TCGA-AP-A0LQ-01	UCEC	WT	2	2
TCGA-AX-A2HF-01	UCEC	WT	65	19
TCGA-D1-A174-01	UCEC	WT	0	0
TCGA-B5-A0JY-01	UCEC	WT	0	0
TCGA-AX-A2HD-01	UCEC	WT	4	0
TCGA-FI-A2CY-01	UCEC	WT	48	7
TCGA-A5-A2K4-01	UCEC	WT	54	18
TCGA-B5-A11U-01	UCEC	WT	2	1
TCGA-BG-A18A-01	UCEC	WT	1	0
TCGA-AJ-A2QM-01	UCEC	WT	53	30
TCGA-AJ-A3BD-01	UCEC	WT	26	12
TCGA-AP-A0LN-01	UCEC	WT	1	0
TCGA-AX-A05Z-01	UCEC	MT	2	0
TCGA-AJ-A3EJ-01	UCEC	WT	61	29
TCGA-BG-A0M6-01	UCEC	WT	40	25
TCGA-AX-A3GB-01	UCEC	WT	1	1
TCGA-AX-A06L-01	UCEC	WT	1	0
TCGA-KJ-A3U4-01	UCEC	WT	37	34
TCGA-B5-A0K3-01	UCEC	WT	82	22
TCGA-D1-A160-01	UCEC	WT	0	0
TCGA-AX-A3FV-01	UCEC	WT	124	56
TCGA-AX-A06J-01	UCEC	WT	6	5
TCGA-BG-A3EW-01	UCEC	WT	1	0
TCGA-BG-A0MA-01	UCEC	WT	1	0
TCGA-BK-A4ZD-01	UCEC	WT	73	37
TCGA-D1-A2G7-01	UCEC	WT	41	10
TCGA-BS-A0U8-01	UCEC	WT	0	0
TCGA-A5-A0GQ-01	UCEC	WT	1	1
TCGA-D1-A17L-01	UCEC	WT	1	1
TCGA-EO-A3B1-01	UCEC	WT	62	24
TCGA-AX-A1C7-01	UCEC	WT	56	32
TCGA-AX-A3G8-01	UCEC	MT	3	1
TCGA-AX-A1CJ-01	UCEC	WT	2	1
TCGA-BG-A0MQ-01	UCEC	WT	1	0
TCGA-B5-A11Q-01	UCEC	WT	9	2
TCGA-E6-A2P9-01	UCEC	WT	1	0
TCGA-BG-A0MS-01	UCEC	WT	1	0
TCGA-EO-A2CH-01	UCEC	WT	52	34
TCGA-EO-A22X-01	UCEC	MT	11	0
TCGA-A5-A0GJ-01	UCEC	WT	59	16
TCGA-EY-A1GU-01	UCEC	WT	0	0
TCGA-EY-A1GH-01	UCEC	WT	1	0
TCGA-D1-A0ZU-01	UCEC	WT	1	0
TCGA-AX-A3G4-01	UCEC	WT	138	81
TCGA-D1-A16E-01	UCEC	WT	2	2
TCGA-B5-A0JU-01	UCEC	WT	1	0
TCGA-FI-A2F9-01	UCEC	WT	63	17
TCGA-EO-A1Y7-01	UCEC	WT	89	27
TCGA-BG-A0VV-01	UCEC	WT	3	1
TCGA-AJ-A8CV-01	UCEC	WT	19	12
TCGA-D1-A176-01	UCEC	WT	1	0
TCGA-BK-A56F-01	UCEC	WT	7	1
TCGA-EY-A1GV-01	UCEC	WT	25	6
TCGA-AX-A062-01	UCEC	WT	1	1
TCGA-A5-A0GD-01	UCEC	WT	54	0
TCGA-AJ-A3OL-01	UCEC	WT	0	0
TCGA-AP-A0LF-01	UCEC	WT	50	25
TCGA-AX-A2H4-01	UCEC	WT	209	89
TCGA-AX-A06B-01	UCEC	WT	89	23
TCGA-D1-A102-01	UCEC	WT	4	1
TCGA-AP-A056-01	UCEC	MT	6	0
TCGA-A5-A0G2-01	UCEC	MT	19	1
TCGA-DF-A2KZ-01	UCEC	WT	2	1
TCGA-D1-A165-01	UCEC	WT	0	0
TCGA-BS-A0TA-01	UCEC	WT	2	2
TCGA-AX-A2HH-01	UCEC	WT	5	0
TCGA-AP-A0LH-01	UCEC	WT	15	2
TCGA-EY-A215-01	UCEC	MT	2	1
TCGA-EY-A3QX-01	UCEC	WT	111	30
TCGA-AP-A1E3-01	UCEC	WT	2	0
TCGA-QS-A8F1-01	UCEC	MT	137	88
TCGA-EY-A214-01	UCEC	WT	51	4
TCGA-BS-A0V4-01	UCEC	WT	2	1
TCGA-B5-A0K7-01	UCEC	WT	0	0
TCGA-5B-A90C-01	UCEC	MT	131	73
TCGA-AJ-A3IA-01	UCEC	WT	218	75
TCGA-AX-A0IU-01	UCEC	WT	27	9
TCGA-D1-A1O7-01	UCEC	WT	3	2
TCGA-AW-A1PO-01	UCEC	WT	59	13
TCGA-K6-A3WQ-01	UCEC	WT	49	23
TCGA-A5-A0GX-01	UCEC	WT	2	0
TCGA-D1-A16S-01	UCEC	WT	67	26
TCGA-DF-A2KS-01	UCEC	WT	60	31
TCGA-AP-A0LJ-01	UCEC	WT	2	0
TCGA-BG-A2L7-01	UCEC	WT	0	0
TCGA-EY-A548-01	UCEC	WT	8	1
TCGA-B5-A3FD-01	UCEC	WT	31	6
TCGA-D1-A0ZS-01	UCEC	WT	2	1
TCGA-BG-A222-01	UCEC	WT	2	1
TCGA-AX-A1CI-01	UCEC	WT	2	1
TCGA-AX-A2H2-01	UCEC	WT	160	66
TCGA-D1-A16V-01	UCEC	WT	25	1
TCGA-AX-A3FS-01	UCEC	WT	3	0
TCGA-EY-A1GF-01	UCEC	WT	4	3
TCGA-BG-A18B-01	UCEC	WT	1	1
TCGA-AJ-A3TW-01	UCEC	WT	91	48
TCGA-DI-A1BY-01	UCEC	WT	2	0
TCGA-AX-A1CP-01	UCEC	WT	29	6
TCGA-SL-A6JA-01	UCEC	WT	10	1
TCGA-BG-A0M3-01	UCEC	WT	0	0
TCGA-EY-A4KR-01	UCEC	WT	131	38
TCGA-EY-A547-01	UCEC	WT	94	10
TCGA-B5-A0JR-01	UCEC	WT	0	0
TCGA-B5-A11G-01	UCEC	WT	8	0
TCGA-A5-A1OK-01	UCEC	WT	2	0
TCGA-EY-A2OO-01	UCEC	WT	1	0
TCGA-D1-A17S-01	UCEC	WT	1	1
TCGA-B5-A1MZ-01	UCEC	WT	0	0
TCGA-AP-A053-01	UCEC	WT	27	4
TCGA-AX-A0IS-01	UCEC	WT	3	0
TCGA-BS-A0V8-01	UCEC	WT	48	26
TCGA-EC-A1QX-01	UCEC	WT	0	0
TCGA-AX-A2HG-01	UCEC	WT	1	0
TCGA-4E-A92E-01	UCEC	WT	5	1
TCGA-BS-A0UL-01	UCEC	WT	2	1
TCGA-A5-A1OG-01	UCEC	WT	50	19
TCGA-AX-A1C5-01	UCEC	WT	2	0
TCGA-BG-A0RY-01	UCEC	WT	2	1
TCGA-B5-A11O-01	UCEC	WT	0	0
TCGA-FI-A2EU-01	UCEC	WT	57	11
TCGA-AJ-A3I9-01	UCEC	WT	27	10
TCGA-B5-A0JV-01	UCEC	WT	4	0
TCGA-5S-A9Q8-01	UCEC	WT	9	1
TCGA-B5-A0JT-01	UCEC	WT	1	0
TCGA-AP-A05P-01	UCEC	WT	1	0
TCGA-BG-A0YU-01	UCEC	WT	2	0
TCGA-AJ-A2QO-01	UCEC	WT	1	0
TCGA-AX-A2HC-01	UCEC	WT	1	0
TCGA-AJ-A3NG-01	UCEC	WT	4	3
TCGA-EY-A54A-01	UCEC	WT	114	17
TCGA-BS-A0TD-01	UCEC	WT	1	0
TCGA-B5-A3S1-01	UCEC	WT	55	26
TCGA-AP-A1DQ-01	UCEC	WT	31	19
TCGA-EY-A1G8-01	UCEC	WT	2	1
TCGA-D1-A15V-01	UCEC	WT	29	13
TCGA-AX-A05S-01	UCEC	WT	4	0
TCGA-AJ-A5DW-01	UCEC	WT	5	1
TCGA-AX-A0J0-01	UCEC	WT	1	0
TCGA-D1-A16J-01	UCEC	WT	12	0
TCGA-AX-A1CF-01	UCEC	WT	78	21
TCGA-AP-A05J-01	UCEC	WT	40	11
TCGA-FI-A3PX-01	UCEC	WT	27	11
TCGA-QS-A5YR-01	UCEC	WT	13	11
TCGA-DI-A2QY-01	UCEC	WT	64	31
TCGA-BG-A0MT-01	UCEC	WT	14	2
TCGA-BG-A0M7-01	UCEC	WT	4	3
TCGA-AP-A1DV-01	UCEC	MT	2	0
TCGA-B5-A11P-01	UCEC	WT	2	1
TCGA-AX-A3G6-01	UCEC	WT	30	9
TCGA-AX-A3FW-01	UCEC	WT	83	34
TCGA-EO-A3L0-01	UCEC	WT	1	0
TCGA-EO-A22U-01	UCEC	WT	3	0
TCGA-QS-A5YQ-01	UCEC	WT	7	4
TCGA-A5-A0GP-01	UCEC	WT	1	0
TCGA-BK-A0CB-01	UCEC	WT	2	0
TCGA-BS-A0UJ-01	UCEC	WT	1	0
TCGA-E6-A1M0-01	UCEC	WT	0	0
TCGA-D1-A17H-01	UCEC	WT	1	0
TCGA-DI-A1BU-01	UCEC	WT	0	0
TCGA-BS-A0T9-01	UCEC	WT	2	0
TCGA-AJ-A8CT-01	UCEC	WT	3	1
TCGA-D1-A1NX-01	UCEC	WT	38	8
TCGA-AX-A1C9-01	UCEC	WT	9	1
TCGA-B5-A0JX-01	UCEC	WT	8	4
TCGA-B5-A11V-01	UCEC	WT	0	0
TCGA-B5-A1MW-01	UCEC	WT	0	0
TCGA-EY-A2ON-01	UCEC	WT	15	6
TCGA-AX-A063-01	UCEC	WT	0	0
TCGA-AP-A0LD-01	UCEC	WT	0	0
TCGA-AX-A3FX-01	UCEC	WT	75	22
TCGA-EY-A2OP-01	UCEC	WT	1	0
TCGA-AJ-A3BG-01	UCEC	WT	3	0
TCGA-A5-A2K5-01	UCEC	WT	1	0
TCGA-D1-A2G5-01	UCEC	WT	1	1
TCGA-EO-A3KU-01	UCEC	WT	17	11
TCGA-D1-A17N-01	UCEC	WT	0	0
TCGA-PG-A915-01	UCEC	WT	41	28
TCGA-D1-A1O5-01	UCEC	WT	1	0
TCGA-D1-A0ZQ-01	UCEC	WT	11	0
TCGA-KP-A3W0-01	UCEC	WT	41	6
TCGA-B5-A3F9-01	UCEC	WT	10	1
TCGA-AP-A0L8-01	UCEC	WT	56	38
TCGA-B5-A5OD-01	UCEC	MT	112	48
TCGA-DF-A2KR-01	UCEC	MT	61	27
TCGA-B5-A0K0-01	UCEC	WT	1	0
TCGA-AX-A06F-01	UCEC	WT	6	1
TCGA-EY-A1GK-01	UCEC	WT	3	2
TCGA-AP-A1DR-01	UCEC	WT	0	0
TCGA-D1-A0ZR-01	UCEC	WT	0	0
TCGA-SJ-A6ZI-01	UCEC	WT	42	13
TCGA-AX-A05T-01	UCEC	WT	3	1
TCGA-BG-A0VT-01	UCEC	WT	2	1
TCGA-D1-A16N-01	UCEC	WT	37	1
TCGA-DF-A2KV-01	UCEC	WT	0	0
TCGA-AP-A1E4-01	UCEC	WT	0	0
TCGA-A5-A3LP-01	UCEC	WT	38	14
TCGA-B5-A3FH-01	UCEC	WT	10	1
TCGA-B5-A0K9-01	UCEC	WT	0	0
TCGA-AX-A06H-01	UCEC	WT	0	0
TCGA-A5-A2K3-01	UCEC	WT	3	2
TCGA-BG-A0VX-01	UCEC	WT	0	0
TCGA-EY-A1GM-01	UCEC	WT	51	15
TCGA-AP-A1DP-01	UCEC	WT	1	0
TCGA-A5-A1OJ-01	UCEC	WT	0	0
TCGA-AX-A2HJ-01	UCEC	WT	6	1
TCGA-AX-A3GI-01	UCEC	WT	152	31
TCGA-PG-A7D5-01	UCEC	WT	150	31
TCGA-AP-A052-01	UCEC	WT	64	8
TCGA-B5-A121-01	UCEC	WT	2	1
TCGA-AX-A2H8-01	UCEC	WT	40	6
TCGA-EY-A212-01	UCEC	WT	123	37
TCGA-B5-A0JS-01	UCEC	WT	0	0
TCGA-AX-A0IW-01	UCEC	WT	102	44
TCGA-AX-A1CC-01	UCEC	WT	19	6
TCGA-AP-A05D-01	UCEC	MT	66	34
TCGA-B5-A3FB-01	UCEC	WT	6	1
TCGA-EY-A210-01	UCEC	WT	24	4
TCGA-AJ-A23N-01	UCEC	WT	22	10
TCGA-BG-A0LX-01	UCEC	WT	2	0
TCGA-B5-A11W-01	UCEC	WT	5	1
TCGA-EY-A1GX-01	UCEC	WT	4	3
TCGA-QF-A5YT-01	UCEC	WT	8	6
TCGA-KP-A3W1-01	UCEC	WT	53	5
TCGA-AJ-A3OK-01	UCEC	WT	1	0
TCGA-A5-A0GV-01	UCEC	WT	1	0
TCGA-AP-A05A-01	UCEC	WT	40	12
TCGA-B5-A0KB-01	UCEC	WT	77	39
TCGA-BS-A0U7-01	UCEC	WT	2	0
TCGA-EY-A72D-01	UCEC	MT	200	124
TCGA-AX-A1CK-01	UCEC	WT	4	1
TCGA-EO-A3AS-01	UCEC	WT	82	18
TCGA-AX-A1C4-01	UCEC	WT	2	2
TCGA-EY-A1GT-01	UCEC	WT	0	0
TCGA-BG-A0VW-01	UCEC	WT	4	1
TCGA-A5-A0GB-01	UCEC	WT	1	1
TCGA-D1-A2G0-01	UCEC	MT	2	1
TCGA-AP-A0LS-01	UCEC	WT	0	0
TCGA-D1-A17C-01	UCEC	WT	1	0
TCGA-EO-A3AV-01	UCEC	MT	0	0
TCGA-A5-A0VQ-01	UCEC	WT	1	0
TCGA-AJ-A5DV-01	UCEC	WT	5	0
TCGA-B5-A11E-01	UCEC	MT	4	0
TCGA-D1-A17Q-01	UCEC	WT	0	0
TCGA-BG-A0M0-01	UCEC	WT	0	0
TCGA-AJ-A3QS-01	UCEC	WT	22	11
TCGA-D1-A16D-01	UCEC	WT	2	0
TCGA-EO-A3AZ-01	UCEC	WT	14	2
TCGA-D1-A15Z-01	UCEC	WT	0	0
TCGA-EY-A1GE-01	UCEC	WT	0	0
TCGA-D1-A169-01	UCEC	WT	11	0
TCGA-AJ-A6NU-01	UCEC	WT	77	12
TCGA-AX-A3G7-01	UCEC	WT	71	8
TCGA-D1-A16B-01	UCEC	WT	0	0
TCGA-A5-A0GW-01	UCEC	WT	7	0
TCGA-AP-A059-01	UCEC	MT	0	0
TCGA-D1-A3JP-01	UCEC	WT	56	35
TCGA-D1-A177-01	UCEC	WT	2	0
TCGA-AJ-A2QK-01	UCEC	WT	21	1
TCGA-AP-A1DK-01	UCEC	WT	1	0
TCGA-FI-A2D4-01	UCEC	MT	4	1
TCGA-BG-A0MO-01	UCEC	WT	2	0
TCGA-EO-A3KW-01	UCEC	WT	53	21
TCGA-AJ-A2QN-01	UCEC	WT	5	0
TCGA-BK-A13B-01	UCEC	WT	1	0
TCGA-AJ-A3NF-01	UCEC	WT	15	9
TCGA-B5-A11I-01	UCEC	WT	38	4
TCGA-D1-A3DH-01	UCEC	MT	123	57
TCGA-EY-A1GD-01	UCEC	MT	0	0
TCGA-BG-A0W1-01	UCEC	WT	1	0
TCGA-BS-A0UT-01	UCEC	WT	0	0
TCGA-A5-A0G5-01	UCEC	WT	205	76
TCGA-D1-A1O8-01	UCEC	WT	0	0
TCGA-B5-A11R-01	UCEC	WT	0	0
TCGA-DI-A1C3-01	UCEC	WT	1	0
TCGA-BS-A0UF-01	UCEC	WT	1	0
TCGA-AX-A2HA-01	UCEC	WT	3	0
TCGA-DF-A2L0-01	UCEC	WT	28	12
TCGA-BG-A187-01	UCEC	WT	1	0
TCGA-FI-A2D5-01	UCEC	MT	5	0
TCGA-PG-A914-01	UCEC	WT	187	95
TCGA-EO-A1Y8-01	UCEC	WT	33	13
TCGA-B5-A0K6-01	UCEC	WT	1	0
TCGA-AX-A05Y-01	UCEC	WT	2	0
TCGA-AJ-A23M-01	UCEC	WT	71	37
TCGA-AX-A2IN-01	UCEC	WT	1	0
TCGA-AJ-A23O-01	UCEC	WT	3	0
TCGA-D1-A163-01	UCEC	WT	3	1
TCGA-AX-A1CN-01	UCEC	WT	7	2
TCGA-AP-A0LI-01	UCEC	WT	65	34
TCGA-A5-A0GM-01	UCEC	WT	0	0
TCGA-D1-A16Y-01	UCEC	WT	0	0
TCGA-AX-A05U-01	UCEC	WT	4	0
TCGA-EY-A1G7-01	UCEC	WT	2	0
TCGA-AP-A0LE-01	UCEC	WT	1	1
TCGA-A5-A0G9-01	UCEC	WT	1	1
TCGA-AX-A3G3-01	UCEC	MT	89	52
TCGA-B5-A0JZ-01	UCEC	WT	1	0
TCGA-A5-A0R9-01	UCEC	WT	0	0
TCGA-AJ-A3EM-01	UCEC	WT	158	82
TCGA-FI-A2EY-01	UCEC	MT	102	36
TCGA-B5-A11S-01	UCEC	WT	1	0
TCGA-61-1910-01	OV	WT	92	24
TCGA-61-1728-01	OV	MT	45	21
TCGA-31-1953-01	OV	WT	80	30
TCGA-13-0764-01	OV	MT	92	18
TCGA-24-1552-01	OV	WT	26	12
TCGA-13-1477-01	OV	WT	8	0
TCGA-30-1862-01	OV	WT	75	25
TCGA-29-1698-01	OV	WT	36	2
TCGA-13-0924-01	OV	WT	33	6
TCGA-23-1021-01	OV	MT	65	7
TCGA-24-2281-01	OV	WT	33	14
TCGA-23-2084-01	OV	WT	43	30
TCGA-04-1516-01	OV	WT	88	36
TCGA-23-1122-01	OV	WT	0	0
TCGA-04-1356-01	OV	WT	127	61
TCGA-24-1426-01	OV	WT	84	16
TCGA-23-1116-01	OV	WT	24	8
TCGA-25-2398-01	OV	WT	25	6
TCGA-25-2409-01	OV	WT	50	32
TCGA-29-1778-01	OV	WT	76	15
TCGA-04-1343-01	OV	WT	52	20
TCGA-13-0791-01	OV	WT	136	50
TCGA-24-1423-01	OV	WT	56	9
TCGA-04-1360-01	OV	WT	70	32
TCGA-42-2582-01	OV	WT	40	8
TCGA-13-1496-01	OV	WT	47	33
TCGA-20-0987-01	OV	WT	103	37
TCGA-24-2024-01	OV	WT	46	7
TCGA-09-1675-01	OV	WT	70	24
TCGA-04-1644-01	OV	WT	40	6
TCGA-61-1903-01	OV	WT	62	17
TCGA-29-1774-01	OV	WT	44	10
TCGA-61-2016-01	OV	WT	45	1
TCGA-13-0795-01	OV	WT	26	8
TCGA-13-1492-01	OV	WT	38	5
TCGA-24-2260-01	OV	WT	115	53
TCGA-13-1485-01	OV	WT	4	0
TCGA-30-1891-01	OV	WT	92	17
TCGA-36-2552-01	OV	WT	49	17
TCGA-61-2096-01	OV	WT	101	33
TCGA-09-0365-01	OV	WT	26	6
TCGA-13-0885-01	OV	WT	49	21
TCGA-29-1763-01	OV	WT	66	46
TCGA-25-1315-01	OV	WT	56	15
TCGA-13-0804-01	OV	WT	38	4
TCGA-36-2542-01	OV	WT	64	19
TCGA-13-0903-01	OV	WT	71	11
TCGA-61-2111-01	OV	WT	0	0
TCGA-24-1565-01	OV	WT	11	2
TCGA-20-1687-01	OV	WT	37	20
TCGA-24-1850-01	OV	WT	121	39
TCGA-29-1694-01	OV	WT	48	9
TCGA-25-1319-01	OV	MT	34	12
TCGA-04-1349-01	OV	MT	31	24
TCGA-24-1564-01	OV	WT	48	18
TCGA-61-1722-01	OV	WT	77	32
TCGA-20-1683-01	OV	WT	73	34
TCGA-13-A5FU-01	OV	WT	89	56
TCGA-23-1031-01	OV	WT	43	21
TCGA-13-0755-01	OV	WT	54	6
TCGA-04-1652-01	OV	MT	23	9
TCGA-31-1959-01	OV	WT	103	25
TCGA-57-1993-01	OV	WT	34	16
TCGA-23-2081-01	OV	WT	53	8
TCGA-09-0369-01	OV	WT	65	30
TCGA-09-2053-01	OV	WT	79	15
TCGA-25-1323-01	OV	WT	63	19
TCGA-13-1512-01	OV	WT	89	29
TCGA-20-0996-01	OV	WT	0	0
TCGA-29-1761-01	OV	MT	113	40
TCGA-61-1738-01	OV	WT	68	20
TCGA-25-2400-01	OV	WT	54	18
TCGA-29-2434-01	OV	MT	154	53
TCGA-13-0751-01	OV	WT	64	28
TCGA-29-2436-01	OV	WT	12	1
TCGA-61-1899-01	OV	WT	41	1
TCGA-13-1404-01	OV	WT	68	19
TCGA-59-2351-01	OV	WT	39	24
TCGA-24-0982-01	OV	MT	43	19
TCGA-61-1734-01	OV	WT	66	21
TCGA-13-1506-01	OV	WT	55	28
TCGA-13-0766-01	OV	WT	99	35
TCGA-29-1770-01	OV	WT	38	21
TCGA-61-1730-01	OV	WT	20	12
TCGA-29-1691-01	OV	WT	85	33
TCGA-61-2101-01	OV	MT	38	10
TCGA-24-1845-01	OV	MT	59	24
TCGA-59-2355-01	OV	WT	38	11
TCGA-10-0927-01	OV	WT	37	20
TCGA-13-0890-01	OV	WT	79	27
TCGA-24-1849-01	OV	WT	31	5
TCGA-13-1410-01	OV	WT	48	21
TCGA-13-0920-01	OV	WT	0	0
TCGA-13-0714-01	OV	WT	96	43
TCGA-24-2293-01	OV	WT	66	29
TCGA-13-0910-01	OV	WT	61	14
TCGA-29-A5NZ-01	OV	WT	102	49
TCGA-13-2065-01	OV	WT	47	27
TCGA-24-1603-01	OV	WT	45	4
TCGA-61-2613-01	OV	WT	66	20
TCGA-23-1123-01	OV	MT	49	22
TCGA-61-2000-01	OV	WT	118	37
TCGA-23-1111-01	OV	WT	25	8
TCGA-25-2404-01	OV	WT	28	16
TCGA-29-1702-01	OV	MT	102	40
TCGA-24-1466-01	OV	WT	169	75
TCGA-36-2539-01	OV	WT	93	20
TCGA-04-1348-01	OV	WT	125	46
TCGA-13-0919-01	OV	WT	36	26
TCGA-61-2009-01	OV	WT	28	10
TCGA-10-0933-01	OV	WT	25	11
TCGA-61-1995-01	OV	WT	13	0
TCGA-24-1427-01	OV	WT	72	37
TCGA-59-A5PD-01	OV	WT	259	127
TCGA-24-1847-01	OV	WT	43	21
TCGA-09-1670-01	OV	WT	0	0
TCGA-30-1855-01	OV	WT	72	27
TCGA-04-1648-01	OV	WT	34	6
TCGA-09-2056-01	OV	WT	46	9
TCGA-04-1361-01	OV	WT	71	20
TCGA-13-0794-01	OV	WT	74	29
TCGA-24-1551-01	OV	WT	151	64
TCGA-09-2044-01	OV	WT	131	38
TCGA-24-2035-01	OV	WT	60	12
TCGA-09-1674-01	OV	WT	33	13
TCGA-13-0884-01	OV	WT	19	9
TCGA-13-1497-01	OV	WT	129	45
TCGA-20-1685-01	OV	WT	53	26
TCGA-61-1904-01	OV	WT	39	8
TCGA-13-0913-01	OV	WT	81	15
TCGA-13-1484-01	OV	WT	36	20
TCGA-23-1114-01	OV	WT	39	14
TCGA-24-1471-01	OV	WT	12	6
TCGA-13-2059-01	OV	MT	137	58
TCGA-42-2588-01	OV	WT	81	22
TCGA-61-2088-01	OV	WT	18	10
TCGA-61-1740-01	OV	WT	112	39
TCGA-25-2042-01	OV	WT	48	15
TCGA-24-1436-01	OV	WT	52	26
TCGA-36-2548-01	OV	WT	56	25
TCGA-29-2431-01	OV	WT	54	26
TCGA-29-1776-01	OV	WT	28	6
TCGA-04-1341-01	OV	WT	79	34
TCGA-61-1736-01	OV	WT	70	20
TCGA-13-0923-01	OV	WT	67	31
TCGA-04-1353-01	OV	WT	56	14
TCGA-04-1655-01	OV	WT	30	4
TCGA-25-1313-01	OV	WT	68	35
TCGA-23-2643-01	OV	WT	54	24
TCGA-04-1357-01	OV	WT	22	15
TCGA-61-2113-01	OV	MT	20	2
TCGA-13-0768-01	OV	WT	37	10
TCGA-59-2350-01	OV	WT	33	3
TCGA-24-1435-01	OV	WT	61	37
TCGA-36-2540-01	OV	WT	8	0
TCGA-13-0889-01	OV	WT	45	8
TCGA-59-2354-01	OV	WT	60	9
TCGA-13-0803-01	OV	WT	66	27
TCGA-24-1413-01	OV	WT	29	4
TCGA-VG-A8LO-01	OV	WT	178	49
TCGA-29-1769-01	OV	WT	87	18
TCGA-36-2544-01	OV	WT	118	33
TCGA-24-2290-01	OV	WT	73	37
TCGA-24-1474-01	OV	MT	64	13
TCGA-36-2530-01	OV	WT	85	25
TCGA-23-1032-01	OV	WT	84	26
TCGA-42-2590-01	OV	WT	37	9
TCGA-13-0906-01	OV	WT	42	9
TCGA-10-0931-01	OV	WT	49	16
TCGA-59-2352-01	OV	MT	50	11
TCGA-OY-A56Q-01	OV	WT	61	5
TCGA-24-1463-01	OV	WT	46	6
TCGA-24-0979-01	OV	MT	32	19
TCGA-13-1500-01	OV	WT	31	1
TCGA-13-0726-01	OV	WT	46	12
TCGA-24-1467-01	OV	WT	31	19
TCGA-04-1332-01	OV	WT	33	13
TCGA-13-1510-01	OV	WT	118	39
TCGA-24-0970-01	OV	WT	111	38
TCGA-25-1320-01	OV	WT	25	4
TCGA-13-1501-01	OV	WT	83	20
TCGA-09-0367-01	OV	WT	36	2
TCGA-24-0975-01	OV	WT	29	6
TCGA-13-0908-01	OV	WT	36	3
TCGA-59-2349-01	OV	WT	0	0
TCGA-25-2408-01	OV	WT	4	0
TCGA-25-1329-01	OV	WT	13	6
TCGA-61-2008-01	OV	WT	33	18
TCGA-04-1649-01	OV	WT	77	25
TCGA-61-1913-01	OV	WT	82	22
TCGA-20-0991-01	OV	WT	16	6
TCGA-13-1505-01	OV	WT	52	11
TCGA-5X-AA5U-01	OV	WT	90	46
TCGA-30-1856-01	OV	WT	257	0
TCGA-24-1417-01	OV	WT	60	33
TCGA-61-2610-02	OV	WT	65	10
TCGA-13-1495-01	OV	WT	80	30
TCGA-59-2372-01	OV	WT	56	28
TCGA-23-1121-01	OV	MT	168	56
TCGA-13-2061-01	OV	WT	127	53
TCGA-36-2551-01	OV	WT	56	8
TCGA-13-2057-01	OV	WT	60	8
TCGA-13-0912-01	OV	WT	51	10
TCGA-24-1843-01	OV	WT	68	32
TCGA-24-1470-01	OV	WT	80	28
TCGA-13-0916-01	OV	WT	93	31
TCGA-42-2589-01	OV	WT	112	27
TCGA-20-1684-01	OV	WT	130	56
TCGA-13-1488-01	OV	WT	43	18
TCGA-09-2050-01	OV	WT	73	14
TCGA-61-2002-01	OV	WT	57	14
TCGA-61-1901-01	OV	WT	39	6
TCGA-29-1710-01	OV	WT	59	18
TCGA-61-2018-01	OV	WT	71	21
TCGA-57-1992-01	OV	WT	61	14
TCGA-10-0937-01	OV	WT	42	6
TCGA-36-2538-01	OV	WT	69	13
TCGA-23-2641-01	OV	WT	57	10
TCGA-04-1367-01	OV	WT	44	4
TCGA-61-1900-01	OV	WT	82	20
TCGA-13-1499-01	OV	WT	43	24
TCGA-29-1781-01	OV	WT	126	43
TCGA-61-1915-01	OV	MT	18	9
TCGA-24-1616-01	OV	WT	27	14
TCGA-61-1727-01	OV	WT	70	33
TCGA-29-2427-01	OV	WT	31	3
TCGA-09-1672-01	OV	WT	5	2
TCGA-24-1550-01	OV	WT	105	28
TCGA-13-0886-01	OV	WT	39	6
TCGA-29-1688-01	OV	WT	38	4
TCGA-24-2288-01	OV	WT	121	8
TCGA-25-1312-01	OV	WT	54	26
TCGA-09-2055-01	OV	WT	31	3
TCGA-10-0926-01	OV	WT	34	17
TCGA-13-0807-01	OV	MT	105	44
TCGA-13-1482-01	OV	WT	52	13
TCGA-61-1737-01	OV	WT	43	5
TCGA-23-2645-01	OV	WT	104	44
TCGA-61-2104-01	OV	MT	38	17
TCGA-13-0888-01	OV	WT	93	18
TCGA-13-1412-01	OV	WT	39	7
TCGA-10-0934-01	OV	WT	17	1
TCGA-29-1764-01	OV	WT	30	14
TCGA-29-1696-01	OV	WT	37	9
TCGA-61-2095-01	OV	WT	11	0
TCGA-04-1651-01	OV	WT	54	10
TCGA-61-1906-01	OV	WT	53	39
TCGA-04-1346-01	OV	WT	42	21
TCGA-57-1994-01	OV	WT	45	25
TCGA-25-2399-01	OV	WT	52	8
TCGA-13-0760-01	OV	MT	196	75
TCGA-13-0717-01	OV	WT	0	0
TCGA-24-1562-01	OV	WT	44	5
TCGA-61-2612-01	OV	WT	32	10
TCGA-61-1725-01	OV	WT	38	9
TCGA-13-1403-01	OV	WT	65	14
TCGA-24-1927-01	OV	WT	72	14
TCGA-24-2262-01	OV	WT	103	34
TCGA-04-1342-01	OV	WT	34	11
TCGA-04-1336-01	OV	WT	48	14
TCGA-29-1784-01	OV	MT	55	27
TCGA-OY-A56P-01	OV	WT	73	14
TCGA-42-2591-01	OV	WT	120	30
TCGA-29-1777-01	OV	WT	106	21
TCGA-29-2429-01	OV	WT	97	36
TCGA-23-2072-01	OV	WT	90	36
TCGA-24-0980-01	OV	WT	25	1
TCGA-13-1511-01	OV	WT	116	46
TCGA-24-1425-01	OV	WT	51	12
TCGA-25-2392-01	OV	WT	53	13
TCGA-29-1701-01	OV	WT	47	20
TCGA-24-1846-01	OV	WT	56	16
TCGA-09-0366-01	OV	WT	38	16
TCGA-13-1489-01	OV	WT	96	57
TCGA-09-2045-01	OV	WT	23	3
TCGA-25-1316-01	OV	WT	2	1
TCGA-61-1733-01	OV	WT	32	18
TCGA-20-0990-01	OV	MT	64	34
TCGA-59-2348-01	OV	WT	54	22
TCGA-23-1118-01	OV	WT	96	23
TCGA-36-2534-01	OV	WT	126	39
TCGA-23-1027-01	OV	WT	49	11
TCGA-13-0897-01	OV	WT	59	9
TCGA-24-1103-01	OV	WT	53	14
TCGA-13-1498-01	OV	WT	111	18
TCGA-24-2298-01	OV	WT	166	62
TCGA-13-0899-01	OV	WT	25	7
TCGA-24-2019-01	OV	WT	71	28
TCGA-13-0893-01	OV	MT	100	38
TCGA-09-2049-01	OV	WT	36	17
TCGA-13-2071-01	OV	WT	81	22
TCGA-61-2102-01	OV	MT	94	33
TCGA-23-1124-01	OV	MT	98	43
TCGA-25-1321-01	OV	MT	47	8
TCGA-29-1768-01	OV	WT	36	5
TCGA-30-1857-01	OV	WT	48	14
TCGA-24-1416-01	OV	WT	21	11
TCGA-61-2092-01	OV	WT	15	6
TCGA-23-1022-01	OV	WT	70	25
TCGA-24-1428-01	OV	MT	101	54
TCGA-13-0720-01	OV	WT	37	10
TCGA-13-2060-01	OV	WT	68	22
TCGA-61-2614-01	OV	WT	46	10
TCGA-24-2254-01	OV	WT	65	20
TCGA-23-1113-01	OV	WT	26	3
TCGA-42-2587-01	OV	WT	51	25
TCGA-13-1504-01	OV	WT	56	14
TCGA-13-0904-01	OV	WT	114	47
TCGA-29-1783-01	OV	MT	31	14
TCGA-24-1424-01	OV	WT	37	13
TCGA-24-1422-01	OV	WT	73	35
TCGA-61-2109-01	OV	WT	70	14
TCGA-13-0724-01	OV	MT	84	39
TCGA-24-1469-01	OV	WT	150	53
TCGA-23-2079-01	OV	WT	47	14
TCGA-09-1664-01	OV	WT	10	0
TCGA-13-0758-01	OV	WT	56	36
TCGA-13-0883-01	OV	WT	29	17
TCGA-24-2033-01	OV	WT	36	12
TCGA-61-1741-01	OV	WT	34	15
TCGA-04-1646-01	OV	WT	35	3
TCGA-24-1434-01	OV	WT	42	20
TCGA-25-2396-01	OV	WT	53	25
TCGA-61-1914-01	OV	WT	43	7
TCGA-29-1705-01	OV	WT	66	10
TCGA-24-2036-01	OV	WT	53	16
TCGA-13-0797-01	OV	WT	55	15
TCGA-04-1362-01	OV	WT	58	27
TCGA-13-1509-01	OV	WT	111	17
TCGA-13-1494-01	OV	WT	92	25
TCGA-09-1673-01	OV	WT	103	42
TCGA-29-1785-01	OV	WT	60	6
TCGA-61-2087-01	OV	WT	77	17
TCGA-61-1911-01	OV	WT	63	29
TCGA-61-2012-01	OV	WT	77	25
TCGA-36-2545-01	OV	WT	49	10
TCGA-29-1699-01	OV	WT	42	8
TCGA-13-1507-01	OV	WT	45	27
TCGA-13-0887-01	OV	WT	101	26
TCGA-31-1950-01	OV	WT	62	27
TCGA-57-1586-01	OV	WT	77	36
TCGA-24-2271-01	OV	WT	32	13
TCGA-13-1491-01	OV	WT	67	18
TCGA-24-2267-01	OV	WT	59	27
TCGA-13-1483-01	OV	WT	47	9
TCGA-30-1718-01	OV	WT	54	8
TCGA-13-0921-01	OV	WT	84	39
TCGA-24-2280-01	OV	WT	50	14
TCGA-13-1487-01	OV	MT	121	46
TCGA-29-1695-01	OV	MT	52	18
TCGA-29-1697-01	OV	WT	78	28
TCGA-13-1411-01	OV	WT	30	12
TCGA-30-1714-01	OV	WT	66	30
TCGA-61-2094-01	OV	WT	35	11
TCGA-13-0757-01	OV	MT	34	14
TCGA-61-1919-01	OV	WT	44	14
TCGA-23-1117-01	OV	WT	96	39
TCGA-09-2051-01	OV	WT	108	54
TCGA-29-1711-01	OV	WT	117	34
TCGA-24-1431-01	OV	MT	58	23
TCGA-24-1418-01	OV	WT	45	31
TCGA-23-2077-01	OV	MT	48	5
TCGA-24-1430-01	OV	WT	50	17
TCGA-61-1895-01	OV	WT	59	15
TCGA-04-1347-01	OV	WT	36	9
TCGA-09-0364-01	OV	WT	79	33
TCGA-10-0930-01	OV	WT	104	47
TCGA-29-1775-01	OV	WT	58	33
TCGA-24-0966-01	OV	WT	32	8
TCGA-24-2261-01	OV	MT	64	33
TCGA-13-0800-01	OV	WT	39	31
TCGA-25-2391-01	OV	WT	56	7
TCGA-25-1314-01	OV	WT	51	20
TCGA-25-2393-01	OV	MT	73	30
TCGA-13-1409-01	OV	WT	19	8
TCGA-29-1762-01	OV	WT	42	10
TCGA-10-0928-01	OV	WT	112	28
TCGA-13-0805-01	OV	WT	38	4
TCGA-61-1998-01	OV	WT	30	4
TCGA-23-1029-01	OV	WT	30	6
TCGA-36-2543-01	OV	WT	163	83
TCGA-61-2110-01	OV	WT	21	3
TCGA-20-1686-01	OV	MT	57	21
TCGA-13-A5FT-01	OV	WT	308	108
TCGA-29-1766-01	OV	WT	44	9
TCGA-59-2363-01	OV	WT	104	33
TCGA-23-1030-01	OV	WT	44	19
TCGA-25-2401-01	OV	WT	64	15
TCGA-29-1693-01	OV	WT	71	43
TCGA-61-2611-02	OV	WT	39	21
TCGA-20-1682-01	OV	WT	70	21
TCGA-24-2295-01	OV	WT	36	12
TCGA-61-2003-01	OV	MT	40	12
TCGA-61-1907-01	OV	MT	49	23
TCGA-24-2030-01	OV	WT	80	37
TCGA-29-2432-01	OV	WT	33	15
TCGA-3P-A9WA-01	OV	MT	149	89
TCGA-13-0905-01	OV	WT	76	21
TCGA-04-1331-01	OV	WT	52	11
TCGA-30-1853-01	OV	WT	55	22
TCGA-13-0911-01	OV	WT	52	30
TCGA-36-2533-01	OV	WT	50	24
TCGA-23-1110-01	OV	WT	56	24
TCGA-24-1842-01	OV	MT	109	42
TCGA-13-1405-01	OV	WT	109	37
TCGA-09-2043-01	OV	WT	114	42
TCGA-23-1809-01	OV	WT	56	19
TCGA-24-1464-01	OV	MT	42	8
TCGA-29-1703-01	OV	WT	32	13
TCGA-36-2537-01	OV	WT	52	13
TCGA-WR-A838-01	OV	MT	18	8
TCGA-42-2593-01	OV	WT	96	52
TCGA-24-1104-01	OV	WT	48	15
TCGA-36-2532-01	OV	WT	91	14
TCGA-29-1771-01	OV	WT	15	0
TCGA-04-1542-01	OV	WT	36	19
TCGA-29-1707-01	OV	WT	61	16
TCGA-24-1844-01	OV	WT	18	5
TCGA-24-1419-01	OV	WT	27	6
TCGA-23-2078-01	OV	WT	77	24
TCGA-13-0891-01	OV	WT	79	45
TCGA-24-2289-01	OV	WT	186	66
TCGA-13-1481-01	OV	WT	73	20
TCGA-25-2397-01	OV	WT	115	38
TCGA-10-0935-01	OV	WT	31	8
TCGA-04-1638-01	OV	WT	19	15
TCGA-24-2038-01	OV	WT	3	2
TCGA-36-2547-01	OV	WT	153	50
TCGA-13-0723-01	OV	WT	65	35
TCGA-44-4112-01	LUAD	WT	37	11
TCGA-NJ-A4YP-01	LUAD	WT	24	9
TCGA-86-8278-01	LUAD	WT	35	5
TCGA-62-A470-01	LUAD	WT	77	61
TCGA-44-6778-01	LUAD	WT	54	35
TCGA-49-AARQ-01	LUAD	WT	89	34
TCGA-97-A4M1-01	LUAD	WT	86	32
TCGA-55-6975-01	LUAD	WT	36	2
TCGA-99-8033-01	LUAD	WT	25	19
TCGA-05-4420-01	LUAD	WT	31	23
TCGA-05-4382-01	LUAD	WT	31	6
TCGA-50-6597-01	LUAD	WT	27	26
TCGA-69-8255-01	LUAD	WT	86	33
TCGA-97-8552-01	LUAD	WT	87	34
TCGA-53-A4EZ-01	LUAD	WT	126	97
TCGA-78-7162-01	LUAD	WT	6	0
TCGA-75-7025-01	LUAD	WT	9	5
TCGA-62-A46U-01	LUAD	WT	54	30
TCGA-MP-A4T8-01	LUAD	WT	60	51
TCGA-05-4430-01	LUAD	WT	19	14
TCGA-55-1596-01	LUAD	WT	23	16
TCGA-93-A4JN-01	LUAD	WT	70	59
TCGA-55-8096-01	LUAD	WT	22	9
TCGA-93-A4JQ-01	LUAD	WT	47	24
TCGA-86-6851-01	LUAD	WT	42	17
TCGA-62-8398-01	LUAD	WT	55	30
TCGA-J2-A4AG-01	LUAD	WT	34	2
TCGA-55-5899-01	LUAD	WT	76	53
TCGA-MP-A4TK-01	LUAD	WT	172	88
TCGA-55-8208-01	LUAD	WT	7	5
TCGA-MN-A4N5-01	LUAD	WT	104	63
TCGA-64-5775-01	LUAD	WT	18	8
TCGA-62-8394-01	LUAD	WT	56	28
TCGA-05-4405-01	LUAD	WT	24	19
TCGA-97-8176-01	LUAD	WT	43	3
TCGA-05-5428-01	LUAD	WT	26	17
TCGA-50-5931-01	LUAD	WT	40	2
TCGA-49-AAR4-01	LUAD	WT	87	23
TCGA-64-1679-01	LUAD	WT	24	14
TCGA-55-6984-01	LUAD	WT	13	0
TCGA-MN-A4N1-01	LUAD	WT	140	20
TCGA-91-6847-01	LUAD	MT	47	15
TCGA-86-8358-01	LUAD	WT	196	67
TCGA-49-AARO-01	LUAD	WT	96	62
TCGA-75-6206-01	LUAD	WT	9	7
TCGA-MP-A4TC-01	LUAD	WT	185	28
TCGA-78-7149-01	LUAD	WT	36	27
TCGA-49-6744-01	LUAD	WT	24	5
TCGA-64-1676-01	LUAD	WT	48	4
TCGA-55-6971-01	LUAD	WT	15	8
TCGA-05-4410-01	LUAD	WT	19	3
TCGA-86-7954-01	LUAD	WT	27	5
TCGA-55-7910-01	LUAD	WT	75	37
TCGA-44-2655-01	LUAD	WT	3	1
TCGA-64-5778-01	LUAD	WT	24	2
TCGA-62-A46Y-01	LUAD	WT	28	4
TCGA-55-6982-01	LUAD	WT	29	10
TCGA-55-6642-01	LUAD	WT	11	4
TCGA-44-6144-01	LUAD	WT	9	1
TCGA-05-4415-01	LUAD	WT	27	18
TCGA-44-A479-01	LUAD	WT	50	31
TCGA-55-8087-01	LUAD	WT	17	1
TCGA-50-6673-01	LUAD	WT	36	14
TCGA-55-8207-01	LUAD	WT	20	14
TCGA-86-6562-01	LUAD	WT	18	11
TCGA-05-4425-01	LUAD	WT	10	2
TCGA-91-8496-01	LUAD	WT	12	1
TCGA-55-8091-01	LUAD	WT	14	0
TCGA-55-7727-01	LUAD	WT	30	7
TCGA-MP-A4SW-01	LUAD	WT	80	15
TCGA-67-6216-01	LUAD	WT	19	1
TCGA-73-4668-01	LUAD	WT	45	39
TCGA-55-8203-01	LUAD	WT	17	15
TCGA-J2-8194-01	LUAD	WT	3	1
TCGA-55-6968-01	LUAD	WT	71	14
TCGA-55-8619-01	LUAD	WT	6	0
TCGA-44-2668-01	LUAD	WT	93	26
TCGA-44-7660-01	LUAD	WT	67	46
TCGA-55-A57B-01	LUAD	WT	129	13
TCGA-55-8507-01	LUAD	WT	119	53
TCGA-NJ-A4YI-01	LUAD	WT	40	35
TCGA-49-AAR0-01	LUAD	WT	172	8
TCGA-86-8281-01	LUAD	WT	8	0
TCGA-91-6831-01	LUAD	WT	47	27
TCGA-75-7027-01	LUAD	WT	23	13
TCGA-38-4625-01	LUAD	WT	37	17
TCGA-44-A4SU-01	LUAD	WT	106	61
TCGA-L9-A444-01	LUAD	WT	122	77
TCGA-73-4666-01	LUAD	WT	20	9
TCGA-86-8668-01	LUAD	WT	44	37
TCGA-50-5072-01	LUAD	WT	11	6
TCGA-55-8512-01	LUAD	WT	50	7
TCGA-44-A47G-01	LUAD	WT	12	5
TCGA-91-6849-01	LUAD	WT	11	1
TCGA-67-3770-01	LUAD	WT	38	9
TCGA-55-6986-01	LUAD	WT	4	0
TCGA-49-4512-01	LUAD	WT	37	9
TCGA-05-5425-01	LUAD	WT	77	18
TCGA-62-A46R-01	LUAD	WT	58	45
TCGA-50-6592-01	LUAD	WT	49	26
TCGA-55-A494-01	LUAD	WT	22	19
TCGA-44-3917-01	LUAD	WT	199	160
TCGA-69-8254-01	LUAD	WT	7	1
TCGA-53-7624-01	LUAD	MT	92	49
TCGA-75-5125-01	LUAD	WT	22	6
TCGA-49-4507-01	LUAD	WT	47	14
TCGA-86-8054-01	LUAD	WT	44	30
TCGA-L4-A4E5-01	LUAD	WT	156	22
TCGA-44-6775-01	LUAD	WT	65	12
TCGA-55-7913-01	LUAD	WT	14	6
TCGA-55-7911-01	LUAD	WT	8	5
TCGA-55-8621-01	LUAD	WT	21	9
TCGA-S2-AA1A-01	LUAD	WT	42	25
TCGA-MP-A4T9-01	LUAD	WT	73	20
TCGA-55-6712-01	LUAD	WT	21	9
TCGA-86-7714-01	LUAD	WT	4	0
TCGA-78-8640-01	LUAD	WT	89	38
TCGA-44-7670-01	LUAD	WT	142	13
TCGA-69-7760-01	LUAD	WT	55	25
TCGA-95-7948-01	LUAD	WT	30	17
TCGA-97-A4M5-01	LUAD	WT	48	5
TCGA-55-A4DG-01	LUAD	WT	95	22
TCGA-86-7711-01	LUAD	WT	44	8
TCGA-05-5423-01	LUAD	WT	40	17
TCGA-44-2661-01	LUAD	WT	10	0
TCGA-55-6985-01	LUAD	WT	31	4
TCGA-L9-A5IP-01	LUAD	WT	235	174
TCGA-55-8615-01	LUAD	WT	92	11
TCGA-44-3398-01	LUAD	WT	0	0
TCGA-73-4662-01	LUAD	WT	27	19
TCGA-05-4434-01	LUAD	WT	34	6
TCGA-93-7347-01	LUAD	WT	11	0
TCGA-MP-A4TF-01	LUAD	WT	94	13
TCGA-L9-A443-01	LUAD	WT	39	32
TCGA-05-4244-01	LUAD	WT	21	10
TCGA-62-A471-01	LUAD	WT	104	61
TCGA-49-4490-01	LUAD	WT	29	2
TCGA-97-8177-01	LUAD	WT	53	37
TCGA-99-7458-01	LUAD	WT	17	0
TCGA-86-8279-01	LUAD	WT	67	5
TCGA-91-A4BD-01	LUAD	WT	22	0
TCGA-38-6178-01	LUAD	WT	41	14
TCGA-44-A47B-01	LUAD	WT	59	51
TCGA-78-7542-01	LUAD	WT	30	6
TCGA-55-7573-01	LUAD	WT	22	16
TCGA-05-5429-01	LUAD	WT	11	5
TCGA-L9-A8F4-01	LUAD	WT	118	83
TCGA-55-6970-01	LUAD	WT	27	2
TCGA-78-7160-01	LUAD	WT	14	0
TCGA-86-7955-01	LUAD	WT	144	41
TCGA-50-5946-01	LUAD	WT	67	31
TCGA-78-7148-01	LUAD	WT	15	0
TCGA-50-5066-01	LUAD	WT	27	11
TCGA-97-8179-01	LUAD	WT	35	28
TCGA-86-A4JF-01	LUAD	MT	21	17
TCGA-55-8092-01	LUAD	WT	43	23
TCGA-50-8459-01	LUAD	WT	28	7
TCGA-75-6207-01	LUAD	WT	61	12
TCGA-75-5122-01	LUAD	WT	20	2
TCGA-97-7938-01	LUAD	WT	14	0
TCGA-49-AARE-01	LUAD	WT	93	40
TCGA-55-7726-01	LUAD	WT	34	9
TCGA-50-5055-01	LUAD	WT	5	3
TCGA-MP-A4TH-01	LUAD	WT	39	11
TCGA-86-8074-01	LUAD	WT	57	25
TCGA-78-8648-01	LUAD	WT	0	0
TCGA-05-4418-01	LUAD	WT	7	0
TCGA-69-7764-01	LUAD	WT	42	3
TCGA-95-7043-01	LUAD	MT	73	24
TCGA-86-7701-01	LUAD	WT	68	34
TCGA-44-2665-01	LUAD	WT	67	9
TCGA-44-6777-01	LUAD	WT	13	1
TCGA-L9-A50W-01	LUAD	WT	71	4
TCGA-50-8460-01	LUAD	WT	28	3
TCGA-55-8505-01	LUAD	WT	65	20
TCGA-86-A4P8-01	LUAD	WT	15	5
TCGA-67-6217-01	LUAD	WT	27	0
TCGA-55-7281-01	LUAD	WT	22	15
TCGA-78-7535-01	LUAD	WT	37	26
TCGA-86-8671-01	LUAD	WT	4	0
TCGA-38-4628-01	LUAD	WT	40	4
TCGA-44-6148-01	LUAD	WT	0	0
TCGA-97-7546-01	LUAD	WT	9	0
TCGA-44-7661-01	LUAD	WT	3	0
TCGA-95-7944-01	LUAD	WT	43	10
TCGA-97-A4M0-01	LUAD	WT	82	70
TCGA-50-5933-01	LUAD	WT	23	2
TCGA-86-8280-01	LUAD	WT	39	20
TCGA-78-7153-01	LUAD	WT	11	8
TCGA-67-3772-01	LUAD	WT	30	4
TCGA-78-8660-01	LUAD	WT	59	12
TCGA-05-4250-01	LUAD	WT	22	11
TCGA-55-7907-01	LUAD	WT	48	20
TCGA-49-6767-01	LUAD	WT	43	26
TCGA-64-1677-01	LUAD	WT	17	10
TCGA-91-6835-01	LUAD	WT	16	2
TCGA-50-5051-01	LUAD	WT	12	9
TCGA-95-7039-01	LUAD	MT	39	14
TCGA-95-A4VN-01	LUAD	WT	31	10
TCGA-44-A47F-01	LUAD	WT	57	1
TCGA-55-A48Z-01	LUAD	WT	71	41
TCGA-05-4395-01	LUAD	WT	45	29
TCGA-44-8119-01	LUAD	WT	51	13
TCGA-69-8253-01	LUAD	WT	12	7
TCGA-J2-A4AE-01	LUAD	WT	39	12
TCGA-75-6203-01	LUAD	WT	3	1
TCGA-50-5942-01	LUAD	WT	3	0
TCGA-50-6590-01	LUAD	WT	34	17
TCGA-67-3774-01	LUAD	WT	23	0
TCGA-86-8056-01	LUAD	WT	30	23
TCGA-80-5608-01	LUAD	WT	20	12
TCGA-55-1595-01	LUAD	MT	20	13
TCGA-55-8205-01	LUAD	WT	20	7
TCGA-44-7669-01	LUAD	WT	60	36
TCGA-99-8025-01	LUAD	WT	44	10
TCGA-49-4506-01	LUAD	WT	15	11
TCGA-05-4426-01	LUAD	WT	15	3
TCGA-55-7283-01	LUAD	WT	12	7
TCGA-78-7155-01	LUAD	WT	126	56
TCGA-86-8055-01	LUAD	WT	24	8
TCGA-78-7159-01	LUAD	WT	10	5
TCGA-44-6774-01	LUAD	WT	12	1
TCGA-44-8120-01	LUAD	WT	42	6
TCGA-69-7763-01	LUAD	WT	36	24
TCGA-97-7554-01	LUAD	WT	32	2
TCGA-69-7761-01	LUAD	WT	21	12
TCGA-73-A9RS-01	LUAD	WT	108	68
TCGA-69-7978-01	LUAD	WT	32	22
TCGA-38-4629-01	LUAD	WT	58	36
TCGA-55-8299-01	LUAD	WT	1	0
TCGA-44-8117-01	LUAD	WT	47	25
TCGA-49-AAR2-01	LUAD	WT	68	3
TCGA-55-A490-01	LUAD	WT	113	56
TCGA-73-4670-01	LUAD	WT	49	24
TCGA-83-5908-01	LUAD	WT	25	2
TCGA-55-6980-01	LUAD	WT	17	6
TCGA-44-6146-01	LUAD	WT	28	2
TCGA-86-8669-01	LUAD	WT	54	35
TCGA-49-4486-01	LUAD	WT	14	0
TCGA-05-4249-01	LUAD	WT	15	4
TCGA-62-8397-01	LUAD	WT	38	22
TCGA-91-6848-01	LUAD	WT	78	17
TCGA-71-6725-01	LUAD	WT	55	20
TCGA-97-7552-01	LUAD	WT	7	1
TCGA-50-5936-01	LUAD	WT	51	4
TCGA-91-7771-01	LUAD	WT	59	10
TCGA-86-8359-01	LUAD	WT	70	27
TCGA-55-8301-01	LUAD	WT	27	18
TCGA-78-7146-01	LUAD	WT	61	25
TCGA-44-3918-01	LUAD	WT	156	45
TCGA-69-7974-01	LUAD	WT	29	9
TCGA-78-7161-01	LUAD	WT	57	26
TCGA-35-4122-01	LUAD	WT	29	19
TCGA-73-4659-01	LUAD	WT	18	5
TCGA-55-8614-01	LUAD	WT	56	37
TCGA-97-7937-01	LUAD	WT	36	25
TCGA-49-AARR-01	LUAD	WT	10	2
TCGA-62-A46V-01	LUAD	WT	55	5
TCGA-75-5147-01	LUAD	WT	24	18
TCGA-49-4494-01	LUAD	WT	19	6
TCGA-49-6745-01	LUAD	WT	15	5
TCGA-05-4402-01	LUAD	WT	16	11
TCGA-4B-A93V-01	LUAD	WT	128	104
TCGA-55-8089-01	LUAD	WT	30	8
TCGA-55-8094-01	LUAD	WT	44	22
TCGA-55-7574-01	LUAD	WT	31	14
TCGA-44-5644-01	LUAD	WT	117	52
TCGA-55-8511-01	LUAD	WT	157	47
TCGA-44-7671-01	LUAD	WT	11	5
TCGA-38-4627-01	LUAD	WT	7	1
TCGA-62-A46P-01	LUAD	WT	57	4
TCGA-91-A4BC-01	LUAD	WT	116	63
TCGA-44-2656-01	LUAD	WT	167	105
TCGA-J2-A4AD-01	LUAD	WT	76	4
TCGA-49-6743-01	LUAD	WT	35	24
TCGA-86-8673-01	LUAD	WT	160	85
TCGA-73-7499-01	LUAD	WT	73	34
TCGA-L9-A7SV-01	LUAD	WT	138	64
TCGA-97-A4LX-01	LUAD	WT	77	6
TCGA-38-4631-01	LUAD	WT	38	21
TCGA-99-AA5R-01	LUAD	WT	5	0
TCGA-05-4390-01	LUAD	WT	14	10
TCGA-MP-A4T7-01	LUAD	WT	43	35
TCGA-69-7765-01	LUAD	WT	14	4
TCGA-95-8494-01	LUAD	WT	66	46
TCGA-97-8171-01	LUAD	WT	100	5
TCGA-55-6972-01	LUAD	WT	14	12
TCGA-69-7979-01	LUAD	WT	207	56
TCGA-73-4677-01	LUAD	WT	9	8
TCGA-78-7158-01	LUAD	MT	6	0
TCGA-73-4675-01	LUAD	WT	20	18
TCGA-69-7980-01	LUAD	WT	111	34
TCGA-97-8547-01	LUAD	WT	100	5
TCGA-05-4433-01	LUAD	WT	19	1
TCGA-50-5932-01	LUAD	WT	36	5
TCGA-97-8175-01	LUAD	WT	37	6
TCGA-50-7109-01	LUAD	WT	44	13
TCGA-44-A47A-01	LUAD	WT	12	5
TCGA-55-8508-01	LUAD	WT	80	52
TCGA-86-7953-01	LUAD	WT	63	50
TCGA-05-4398-01	LUAD	WT	57	3
TCGA-93-A4JO-01	LUAD	WT	92	41
TCGA-44-6145-01	LUAD	WT	18	1
TCGA-44-6147-01	LUAD	WT	13	1
TCGA-67-3773-01	LUAD	WT	8	3
TCGA-55-7724-01	LUAD	WT	13	2
TCGA-75-6211-01	LUAD	WT	71	36
TCGA-55-8510-01	LUAD	WT	94	64
TCGA-55-8085-01	LUAD	WT	33	7
TCGA-55-8090-01	LUAD	WT	10	6
TCGA-86-8073-01	LUAD	WT	24	0
TCGA-91-6828-01	LUAD	WT	18	3
TCGA-49-4514-01	LUAD	WT	47	8
TCGA-05-4396-01	LUAD	WT	31	4
TCGA-MN-A4N4-01	LUAD	WT	40	8
TCGA-55-8204-01	LUAD	WT	15	3
TCGA-55-7728-01	LUAD	WT	12	1
TCGA-86-8076-01	LUAD	WT	2	0
TCGA-97-A4M6-01	LUAD	WT	85	5
TCGA-75-7031-01	LUAD	WT	53	34
TCGA-50-5044-01	LUAD	WT	4	0
TCGA-64-5781-01	LUAD	WT	16	5
TCGA-49-4510-01	LUAD	WT	26	19
TCGA-05-5420-01	LUAD	WT	14	2
TCGA-NJ-A4YF-01	LUAD	WT	287	136
TCGA-49-AAR3-01	LUAD	WT	101	57
TCGA-78-7154-01	LUAD	WT	91	25
TCGA-05-4384-01	LUAD	WT	3	0
TCGA-55-A4DF-01	LUAD	MT	77	29
TCGA-44-7667-01	LUAD	WT	53	3
TCGA-50-5939-01	LUAD	WT	30	2
TCGA-O1-A52J-01	LUAD	WT	155	83
TCGA-91-8497-01	LUAD	WT	31	5
TCGA-78-7167-01	LUAD	WT	33	13
TCGA-78-8662-01	LUAD	WT	229	123
TCGA-05-4427-01	LUAD	WT	7	0
TCGA-L9-A743-01	LUAD	MT	45	1
TCGA-97-A4M3-01	LUAD	WT	124	42
TCGA-MP-A4T2-01	LUAD	WT	17	12
TCGA-78-7220-01	LUAD	MT	63	31
TCGA-86-8585-01	LUAD	WT	88	74
TCGA-75-6205-01	LUAD	WT	25	1
TCGA-99-8028-01	LUAD	WT	8	2
TCGA-05-4422-01	LUAD	WT	41	0
TCGA-55-7903-01	LUAD	WT	47	14
TCGA-49-4487-01	LUAD	WT	17	7
TCGA-55-A493-01	LUAD	WT	77	5
TCGA-78-7147-01	LUAD	WT	73	39
TCGA-75-5126-01	LUAD	WT	10	5
TCGA-50-6591-01	LUAD	WT	56	5
TCGA-55-8206-01	LUAD	WT	8	3
TCGA-97-7553-01	LUAD	WT	23	5
TCGA-MP-A4TE-01	LUAD	WT	58	48
TCGA-55-6979-01	LUAD	WT	20	3
TCGA-NJ-A7XG-01	LUAD	WT	29	19
TCGA-55-A48X-01	LUAD	WT	47	7
TCGA-55-8514-01	LUAD	WT	136	107
TCGA-50-5944-01	LUAD	WT	54	18
TCGA-49-AAR9-01	LUAD	WT	300	139
TCGA-50-6594-01	LUAD	WT	76	47
TCGA-55-8513-01	LUAD	WT	5	1
TCGA-95-A4VK-01	LUAD	WT	62	6
TCGA-64-1680-01	LUAD	WT	4	4
TCGA-35-3615-01	LUAD	WT	14	0
TCGA-49-4488-01	LUAD	WT	90	9
TCGA-35-4123-01	LUAD	WT	32	8
TCGA-55-1594-01	LUAD	WT	43	22
TCGA-55-7994-01	LUAD	WT	134	57
TCGA-67-6215-01	LUAD	WT	17	7
TCGA-78-7537-01	LUAD	WT	8	1
TCGA-05-4403-01	LUAD	WT	7	5
TCGA-44-2659-01	LUAD	WT	18	6
TCGA-55-8097-01	LUAD	WT	14	0
TCGA-MP-A5C7-01	LUAD	WT	64	10
TCGA-05-4424-01	LUAD	WT	14	2
TCGA-MP-A4TI-01	LUAD	WT	84	41
TCGA-44-5645-01	LUAD	WT	57	45
TCGA-35-5375-01	LUAD	WT	51	13
TCGA-44-3919-01	LUAD	WT	20	2
TCGA-97-7547-01	LUAD	WT	17	8
TCGA-80-5611-01	LUAD	WT	62	30
TCGA-49-4501-01	LUAD	WT	53	34
TCGA-49-6742-01	LUAD	WT	13	11
TCGA-73-7498-01	LUAD	WT	22	0
TCGA-38-4632-01	LUAD	WT	19	10
TCGA-NJ-A4YQ-01	LUAD	WT	133	12
TCGA-38-4630-01	LUAD	WT	191	49
TCGA-55-1592-01	LUAD	WT	31	18
TCGA-62-A46O-01	LUAD	WT	114	70
TCGA-44-6779-01	LUAD	WT	43	1
TCGA-75-6214-01	LUAD	WT	64	35
TCGA-86-A4P7-01	LUAD	WT	38	17
TCGA-49-6761-01	LUAD	WT	17	11
TCGA-93-7348-01	LUAD	WT	12	0
TCGA-99-8032-01	LUAD	WT	12	9
TCGA-50-5935-01	LUAD	WT	26	6
TCGA-55-6981-01	LUAD	WT	17	10
TCGA-78-8655-01	LUAD	WT	55	17
TCGA-78-7163-01	LUAD	WT	16	4
TCGA-97-7941-01	LUAD	WT	8	2
TCGA-MP-A4TA-01	LUAD	WT	74	8
TCGA-97-8174-01	LUAD	WT	55	41
TCGA-75-5146-01	LUAD	WT	39	1
TCGA-55-7914-01	LUAD	WT	26	3
TCGA-91-6840-01	LUAD	WT	106	38
TCGA-05-4432-01	LUAD	WT	27	12
TCGA-64-5779-01	LUAD	WT	57	34
TCGA-NJ-A55R-01	LUAD	WT	29	11
TCGA-67-4679-01	LUAD	WT	5	0
TCGA-64-5774-01	LUAD	WT	46	20
TCGA-55-8620-01	LUAD	WT	150	75
TCGA-55-7570-01	LUAD	WT	34	7
TCGA-64-5815-01	LUAD	WT	20	0
TCGA-MP-A4SY-01	LUAD	WT	26	6
TCGA-93-A4JP-01	LUAD	WT	54	44
TCGA-44-2657-01	LUAD	WT	24	1
TCGA-95-8039-01	LUAD	WT	15	3
TCGA-50-5941-01	LUAD	WT	12	5
TCGA-62-8399-01	LUAD	WT	65	34
TCGA-95-7562-01	LUAD	WT	30	15
TCGA-75-7030-01	LUAD	WT	0	0
TCGA-55-7576-01	LUAD	WT	61	35
TCGA-55-7725-01	LUAD	WT	10	0
TCGA-38-A44F-01	LUAD	WT	6	2
TCGA-80-5607-01	LUAD	WT	7	1
TCGA-49-AAQV-01	LUAD	WT	92	19
TCGA-44-2662-01	LUAD	WT	109	75
TCGA-05-4397-01	LUAD	WT	56	7
TCGA-62-8395-01	LUAD	WT	55	0
TCGA-86-8672-01	LUAD	WT	101	64
TCGA-75-6212-01	LUAD	WT	1	0
TCGA-44-2666-01	LUAD	WT	36	4
TCGA-50-5930-01	LUAD	WT	85	64
TCGA-49-4505-01	LUAD	WT	24	9
TCGA-55-7284-01	LUAD	WT	4	1
TCGA-91-6829-01	LUAD	WT	47	28
TCGA-44-6776-01	LUAD	WT	7	2
TCGA-55-6983-01	LUAD	WT	7	0
TCGA-93-8067-01	LUAD	WT	168	50
TCGA-91-8499-01	LUAD	WT	217	87
TCGA-95-7567-01	LUAD	WT	71	31
TCGA-49-AARN-01	LUAD	WT	63	0
TCGA-73-4676-01	LUAD	WT	54	19
TCGA-91-6836-01	LUAD	WT	72	39
TCGA-55-8616-01	LUAD	WT	88	33
TCGA-38-7271-01	LUAD	WT	1	0
TCGA-50-5045-01	LUAD	WT	14	7
TCGA-91-6830-01	LUAD	WT	12	1
TCGA-55-A491-01	LUAD	WT	73	41
TCGA-78-7150-01	LUAD	WT	62	17
TCGA-86-8674-01	LUAD	WT	21	3
TCGA-55-6978-01	LUAD	WT	14	7
TCGA-NJ-A4YG-01	LUAD	WT	43	18
TCGA-50-8457-01	LUAD	WT	13	12
TCGA-44-A4SS-01	LUAD	WT	39	20
TCGA-55-A492-01	LUAD	WT	16	11
TCGA-53-7626-01	LUAD	WT	26	5
TCGA-55-6969-01	LUAD	WT	24	11
TCGA-62-A472-01	LUAD	WT	51	36
TCGA-78-7166-01	LUAD	WT	6	0
TCGA-55-A48Y-01	LUAD	WT	41	2
TCGA-MP-A4SV-01	LUAD	WT	61	17
TCGA-50-6595-01	LUAD	WT	13	8
TCGA-55-6543-01	LUAD	WT	16	3
TCGA-86-8075-01	LUAD	WT	31	10
TCGA-05-4389-01	LUAD	WT	39	30
TCGA-50-5049-01	LUAD	WT	35	9
TCGA-73-4658-01	LUAD	WT	8	1
TCGA-97-A4M2-01	LUAD	WT	6	1
TCGA-44-5643-01	LUAD	WT	42	8
TCGA-44-7659-01	LUAD	WT	3	1
TCGA-62-8402-01	LUAD	WT	104	12
TCGA-55-7995-01	LUAD	WT	115	49
TCGA-55-6987-01	LUAD	WT	23	13
TCGA-05-4417-01	LUAD	WT	11	6
TCGA-86-A456-01	LUAD	WT	52	4
TCGA-97-A4M7-01	LUAD	WT	53	6
TCGA-78-7536-01	LUAD	WT	124	47
TCGA-78-7633-01	LUAD	WT	5	1
TCGA-78-7156-01	LUAD	WT	14	0
TCGA-44-7662-01	LUAD	WT	58	29
TCGA-55-8506-01	LUAD	WT	106	60
TCGA-50-5068-01	LUAD	WT	29	19
TCGA-44-3396-01	LUAD	WT	3	0
TCGA-53-7813-01	LUAD	WT	14	12
TCGA-NJ-A55A-01	LUAD	WT	11	3
TCGA-78-7540-01	LUAD	WT	20	2
TCGA-38-4626-01	LUAD	WT	1	0
TCGA-55-7815-01	LUAD	WT	12	7
TCGA-44-7672-01	LUAD	WT	22	11
TCGA-97-8172-01	LUAD	WT	6	6
TCGA-64-1681-01	LUAD	WT	27	5
TCGA-95-A4VP-01	LUAD	WT	85	39
TCGA-05-5715-01	LUAD	WT	29	3
TCGA-78-7152-01	LUAD	WT	23	1
TCGA-78-7539-01	LUAD	WT	51	19
TCGA-62-A46S-01	LUAD	WT	36	22
TCGA-95-7947-01	LUAD	WT	27	7
TCGA-J2-8192-01	LUAD	WT	38	9
TCGA-78-7145-01	LUAD	WT	43	24
TCGA-50-6593-01	LUAD	WT	31	17
TCGA-69-7973-01	LUAD	WT	15	8
TCGA-86-7713-01	LUAD	WT	22	14
TCGA-55-8302-01	LUAD	WT	82	39
TCGA-67-3771-01	LUAD	WT	37	18
TCGA-AF-3911-01	COAD	MT	18	5
TCGA-A6-6780-01	COAD	WT	26	8
TCGA-AG-3901-01	COAD	WT	7	0
TCGA-3L-AA1B-01	COAD	WT	24	12
TCGA-D5-5538-01	COAD	WT	39	2
TCGA-F4-6854-01	COAD	WT	24	2
TCGA-AG-3898-01	COAD	WT	17	8
TCGA-AA-3821-01	COAD	WT	5	1
TCGA-AG-A026-01	COAD	WT	39	24
TCGA-CM-5864-01	COAD	WT	4	2
TCGA-F5-6464-01	COAD	WT	15	4
TCGA-AA-3930-01	COAD	WT	22	6
TCGA-A6-A567-01	COAD	WT	98	5
TCGA-G4-6304-01	COAD	WT	1	0
TCGA-AZ-4308-01	COAD	WT	58	0
TCGA-AD-6965-01	COAD	WT	28	11
TCGA-AA-3982-01	COAD	WT	61	5
TCGA-AD-6548-01	COAD	WT	19	3
TCGA-AG-3882-01	COAD	WT	46	3
TCGA-AA-3971-01	COAD	WT	35	13
TCGA-A6-5660-01	COAD	MT	11	5
TCGA-AZ-6600-01	COAD	WT	15	8
TCGA-AG-3894-01	COAD	WT	5	0
TCGA-F4-6808-01	COAD	WT	36	30
TCGA-AG-3896-01	COAD	WT	19	7
TCGA-D5-6540-01	COAD	WT	2	1
TCGA-F5-6571-01	COAD	WT	15	0
TCGA-D5-6926-01	COAD	WT	7	6
TCGA-CM-4748-01	COAD	WT	5	1
TCGA-AG-3909-01	COAD	WT	10	5
TCGA-5M-AATE-01	COAD	WT	49	15
TCGA-AG-A011-01	COAD	WT	34	8
TCGA-D5-5541-01	COAD	WT	19	2
TCGA-CM-5862-01	COAD	MT	29	13
TCGA-AA-3666-01	COAD	MT	33	16
TCGA-AA-3511-01	COAD	WT	16	11
TCGA-AA-3811-01	COAD	MT	0	0
TCGA-CI-6622-01	COAD	WT	10	0
TCGA-EI-6506-01	COAD	WT	21	7
TCGA-AM-5821-01	COAD	WT	12	1
TCGA-F5-6812-01	COAD	MT	12	3
TCGA-G4-6588-01	COAD	WT	5	0
TCGA-AA-3867-01	COAD	MT	22	12
TCGA-EI-6512-01	COAD	WT	21	9
TCGA-A6-6648-01	COAD	WT	49	21
TCGA-NH-A6GC-01	COAD	WT	70	45
TCGA-AA-3856-01	COAD	WT	8	5
TCGA-G4-6321-01	COAD	WT	1	1
TCGA-AA-A01V-01	COAD	WT	3	0
TCGA-AA-3697-01	COAD	WT	11	6
TCGA-QG-A5YX-01	COAD	WT	42	0
TCGA-DM-A28C-01	COAD	WT	2	0
TCGA-AZ-6606-01	COAD	WT	21	6
TCGA-F4-6570-01	COAD	WT	9	1
TCGA-DC-4745-01	COAD	WT	84	24
TCGA-AF-A56K-01	COAD	WT	59	30
[truncated: 2,320 more rows]
